# Supplementary material for: Impact and variability of social determinants of health on the transmission and outcomes of COVID-19 across the world: a systematic review protocol
Source: PubMed Central journal article supplement — BMJ Open. 2021 Dec 1;11(12):e053481. doi: 10.1136/bmjopen-2021-053481 (PMC8637315; doi:10.1136/bmjopen-2021-053481), 2021-12-01
Supplement: bmjopen-2021-053481.draft_revisions.pdf [file bmjopen-2021-053481.draft_revisions.pdf]

# BMJ Open

BMJ Open is committed to open peer review. As part of this commitment we make the peer review history of every article we publish publicly available.

When an article is published we post the peer reviewers' comments and the authors' responses online. We also post the versions of the paper that were used during peer review. These are the versions that the peer review comments apply to.

The versions of the paper that follow are the versions that were submitted during the peer review process. They are not the versions of record or the final published versions. They should not be cited or distributed as the published version of this manuscript.

BMJ Open is an open access journal and the full, final, typeset and author-corrected version of record of the manuscript is available on our site with no access controls, subscription charges or pay-per-view fees (<http://bmjopen.bmj.com>).

If you have any questions on BMJ Open's open peer review process please email [info.bmjopen@bmj.com](mailto:info.bmjopen@bmj.com)

# BMJ Open

## The impact and variability of social determinants of health on the transmission and outcomes of COVID-19 across the world: a systematic review protocol

|                               |                                                                                                                                                                                                                                                                                                                                                                                                                                                                                                                                                                                                                                                                                                                                                                                                                                                                                                                                                                                                                                                                                                                                                                                                                                                                                                                                                                   |
|-------------------------------|-------------------------------------------------------------------------------------------------------------------------------------------------------------------------------------------------------------------------------------------------------------------------------------------------------------------------------------------------------------------------------------------------------------------------------------------------------------------------------------------------------------------------------------------------------------------------------------------------------------------------------------------------------------------------------------------------------------------------------------------------------------------------------------------------------------------------------------------------------------------------------------------------------------------------------------------------------------------------------------------------------------------------------------------------------------------------------------------------------------------------------------------------------------------------------------------------------------------------------------------------------------------------------------------------------------------------------------------------------------------|
| Journal:                      | <i>BMJ Open</i>                                                                                                                                                                                                                                                                                                                                                                                                                                                                                                                                                                                                                                                                                                                                                                                                                                                                                                                                                                                                                                                                                                                                                                                                                                                                                                                                                   |
| Manuscript ID                 | bmjopen-2021-053481                                                                                                                                                                                                                                                                                                                                                                                                                                                                                                                                                                                                                                                                                                                                                                                                                                                                                                                                                                                                                                                                                                                                                                                                                                                                                                                                               |
| Article Type:                 | Protocol                                                                                                                                                                                                                                                                                                                                                                                                                                                                                                                                                                                                                                                                                                                                                                                                                                                                                                                                                                                                                                                                                                                                                                                                                                                                                                                                                          |
| Date Submitted by the Author: | 13-May-2021                                                                                                                                                                                                                                                                                                                                                                                                                                                                                                                                                                                                                                                                                                                                                                                                                                                                                                                                                                                                                                                                                                                                                                                                                                                                                                                                                       |
| Complete List of Authors:     | <p>Abedin, Minhazul; Centre for Injury Prevention and Research Bangladesh, Public Health Sciences</p> <p>Wahab, Abrar; Centre for Injury Prevention and Research Bangladesh, Public Health Sciences</p> <p>Rahman, Farah; Centre for Injury Prevention and Research Bangladesh, Public Health Sciences</p> <p>Omi, Fardina ; Bangladesh University of Health Sciences, Noncommunicable Diseases</p> <p>Shareen, Saadia ; Independent University, Department of Life Sciences, School of Environment and Life Sciences</p> <p>Rakhshanda, Shagoofa; Centre for Injury Prevention and Research Bangladesh, Public Health Sciences</p> <p>Islam, Labida; Centre for Injury Prevention and Research Bangladesh, Public Health Sciences</p> <p>Mayaboti, Cinderella ; Centre for Injury Prevention and Research Bangladesh, Public Health Sciences</p> <p>Saha, Uttam ; Centre for Injury Prevention and Research Bangladesh, Public Health Sciences</p> <p>Faruque, Fazlay; The University of Mississippi Medical Center, Department of Preventive Medicine, School of Population Health</p> <p>Fletcher, Lauren; The University of Mississippi Medical Center, Rowland Medical Library</p> <p>Mashreky, Saidur; Centre for Injury Prevention and Research Bangladesh, Public Health Sciences; Bangladesh University of Health Sciences, Noncommunicable Diseases</p> |
| Keywords:                     | Epidemiology < TROPICAL MEDICINE, Public health < INFECTIOUS DISEASES, PUBLIC HEALTH                                                                                                                                                                                                                                                                                                                                                                                                                                                                                                                                                                                                                                                                                                                                                                                                                                                                                                                                                                                                                                                                                                                                                                                                                                                                              |
|                               |                                                                                                                                                                                                                                                                                                                                                                                                                                                                                                                                                                                                                                                                                                                                                                                                                                                                                                                                                                                                                                                                                                                                                                                                                                                                                                                                                                   |

SCHOLARONE™  
Manuscripts

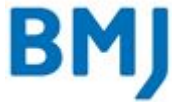

I, the Submitting Author has the right to grant and does grant on behalf of all authors of the Work (as defined in the below author licence), an exclusive licence and/or a non-exclusive licence for contributions from authors who are: i) UK Crown employees; ii) where BMJ has agreed a CC-BY licence shall apply, and/or iii) in accordance with the terms applicable for US Federal Government officers or employees acting as part of their official duties; on a worldwide, perpetual, irrevocable, royalty-free basis to BMJ Publishing Group Ltd ("BMJ") its licensees and where the relevant Journal is co-owned by BMJ to the co-owners of the Journal, to publish the Work in this journal and any other BMJ products and to exploit all rights, as set out in our [licence](#).

The Submitting Author accepts and understands that any supply made under these terms is made by BMJ to the Submitting Author unless you are acting as an employee on behalf of your employer or a postgraduate student of an affiliated institution which is paying any applicable article publishing charge ("APC") for Open Access articles. Where the Submitting Author wishes to make the Work available on an Open Access basis (and intends to pay the relevant APC), the terms of reuse of such Open Access shall be governed by a Creative Commons licence – details of these licences and which [Creative Commons](#) licence will apply to this Work are set out in our licence referred to above.

Other than as permitted in any relevant BMJ Author's Self Archiving Policies, I confirm this Work has not been accepted for publication elsewhere, is not being considered for publication elsewhere and does not duplicate material already published. I confirm all authors consent to publication of this Work and authorise the granting of this licence.

1

2  
3 **The impact and variability of social determinants of health on the transmission and outcomes**  
4 **of COVID-19 across the world: a systematic review protocol**  
5  
6  
7  
8  
9

10 Minhazul Abedin<sup>a</sup>, Abrar Wahab<sup>a</sup>, Farah Naz Rahman<sup>a</sup>, Fardina Rahman Omi<sup>b</sup>, Saadia Shareen<sup>c</sup>,  
11 Shagoofa Rakhshanda<sup>a</sup>, Labida Islam<sup>a</sup>, Cinderella Akbar Mayaboti<sup>a</sup>, Uttam Kumar Saha<sup>a</sup>, Fazlay  
12 Faruque<sup>d</sup>, Lauren M. Fletcher<sup>e</sup>, Saidur Mashreky<sup>ab</sup>  
13  
14  
15  
16  
17

18 <sup>a</sup>Department of Public Health Sciences, Centre for Injury Prevention and Research, Bangladesh,  
19 B-162, Road-23 New DOHS, Mohakhali, Dhaka-1206, Bangladesh  
20

21 <sup>b</sup>Bangladesh University of Health Sciences, 125/1 Darus Salam Rd, Dhaka 1216, Bangladesh  
22  
23

24 <sup>c</sup>Department of Life Sciences, School of Environment and Life Sciences, Independent University,  
25 Bashundhara R/A, Dhaka-1229, Bangladesh  
26

27 <sup>d</sup>Department of Preventive Medicine, School of Population Health, University of Mississippi  
28 Medical Center, 2500 North State Street, Jackson, MS, 39216, USA  
29  
30

31 <sup>e</sup>Rowland Medical Library, University of Mississippi Medical Center, 2500 North State Street,  
32 Jackson, MS, 39216, USA  
33  
34  
35  
36  
37  
38

39 **\*Correspondence to**

40 Minhazul Abedin

41 Department of Public Health Sciences, Centre for Injury Prevention and Research, Bangladesh

42 Address: B-162, Road-23 New DOHS, Mohakhali, Dhaka-1206, Bangladesh

43 Email: [abedin@ciprb.org](mailto:abedin@ciprb.org)

44 Phone: +8801756503780  
45  
46  
47  
48  
49  
50  
51

52 **Word Count: ≈3004 Words**  
53  
54  
55  
56  
57  
58  
59  
60

2

**STRENGTHS AND LIMITATIONS OF THIS STUDY:**

- ◆ This review will address the impact of a wide range of social determinants of health (SODH) and the geographical variations that affect the transmission and outcomes of COVID-19.
- ◆ A multidisciplinary team is involved in this review and the search strategy was undertaken with the involvement of a library information scientist.
- ◆ A standard scientific reporting format will be used to summarize the review findings to avoid the shortcoming and biases of narrative synthesis.
- ◆ The influx of journal articles that were published over the last year in response to the current pandemic, without a scientific track record of previous studies, were reviewed in this manuscript

3

**ABSTRACT****Introduction:**

The COVID-19 pandemic has exacerbated health inequalities across the globe, disproportionately affecting those with poor social determinants of health (SDOH). It is imperative to understand how SDOH influences the transmission and outcomes (positive case, hospitalization and mortality) of COVID-19. This systematic review will investigate the impact of a wide range of SDOH across the globe on the transmission and outcomes of COVID-19.

**Methods and analysis:**

This review will follow the Preferred Reporting Items for Systematic Reviews and Meta-Analyses Protocol (PRISMA) guidelines. We searched articles published from January 1, 2019, to December 31, 2021, in three electronic bibliographic databases (MEDLINE via PubMed, Embase and Scopus), as well as the WHO COVID-19 Global Research on coronavirus disease database. We will consider observational studies that report statistical relationships between the social determinants of health (as listed in PROGRESS-Plus and Healthy People 2020) and COVID-19 transmission and outcomes. There will be no limitation on the geographical location of publications. The quality of included observational studies will be assessed using a modified version of the Newcastle Ottawa Scale (NOS). A narrative Synthesis without Meta-Analysis (SWiM) reporting standards will be used to report the review findings.

**Ethics and dissemination:**

This review will be based on published studies obtained from publicly available sources, and therefore, ethical approval is not required. We will publish the results of this review in a peer-reviewed journal, as well as present the study findings at a national conference.

**PROSPERO registration number:** CRD42021228818

**Keywords:**

Social determinants of health, COVID-19, transmission, outcomes, geographical variations

4

## INTRODUCTION

In December 2019, a pneumonia case associated with SARS-CoV-2 was first identified in Wuhan, Hubei province, China. As of 24 April 2021, this emerging infection has caused 154,640,649 infections and 3,232,285 deaths globally.[1] The current experience of the COVID-19 pandemic has taken the world by surprise, despite the modern advances in health sciences. Outcomes of the disease include not only an increased death toll but has put a spotlight on health inequalities.[2] According to the World Health Organization (WHO), social determinants of health (SDOH) are the non-medical factors that influence the health outcome of humans. They broadly define it by the conditions in which people are born, grow, work, live, and age and the wider set of forces and systems shaping the conditions of daily life.[3] All these conditions have a major impact on the health, wellbeing and quality of life of an individual.[4] The transmission of any communicable disease is highly dependent on these SDOH. The vast dynamics of disease transmission may result in symptomatic or asymptomatic disease outcomes, which may lead to hospitalization and/or death. Generally, people residing in socioeconomically underdeveloped areas are at least three times more likely to die of preventable diseases compared to those in developed areas.[5] The socioeconomically disadvantaged population also has limited access to healthcare services. Studies show that even those who live above the poverty line are more prone to be affected by chronic health conditions.[6]

This pandemic has made it clear that social determinants of health differentially affect disease transmission and outcomes globally.[2] Reports and studies generated from countries with high infection rates suggest that geographic variations were signifying higher transmission rates, hospitalizations and mortality in marginalized, densely populated, low-income, and crowded households.[7–12]. Populations living in crowded neighborhoods are at a higher risk of becoming ill and transmitting the virus at an increased rate, as social distancing may not be feasible.[13–15]

5

1  
2  
3 Access to health care services is described by the National Academies of Sciences, Engineering,  
4 and Medicine as the “timely use of personal health services to achieve the best possible health  
5 outcomes”. [16] Access to healthcare is an influential SDOH that has gained attention during this  
6 COVID-19 pandemic. [17, 18] Accessibility to health care services may include geographic  
7 accessibility (within physical reach), economic accessibility (within financial reach) and cultural  
8 accessibility (acceptance and communication). [19–21] Health insurance is an important aspect  
9 of accessibility which is evident from several studies and reports. It has been demonstrated that  
10 there is unequal coverage of health insurance and access to services, leading to poorer health  
11 outcomes in marginalized groups. [22, 23] In a study by Gallup and West Health, it was found  
12 that 14% of adults in the U.S. do not seek healthcare when experiencing fever and dry cough due  
13 to the high cost of healthcare. [24] Given the fact that fever and dry cough are the most common  
14 symptoms of COVID-19, there is a high chance that many COVID-19 cases may go unnoticed or  
15 undiagnosed, which may result in unknowingly transmitting the disease. [25] Primary care visits  
16 may not be feasible, or people may hesitate to use health care resources without health  
17 insurance. This inability puts those without health insurance at risk of not being screened for  
18 chronic conditions, such as CVD (cardiovascular disease), hypertension, asthma, and diabetes.  
19 Therefore during this health emergency, access to health care may play a major role in whether  
20 an individual will test for COVID-19 and follow recommendations, such as social distancing and  
21 other preventive measures. [26]

22  
23  
24  
25  
26  
27  
28  
29  
30  
31  
32  
33  
34  
35  
36  
37  
38  
39  
40 In terms of racial disparities, the United States has experienced disproportionate outcomes of  
41 infection, hospitalization and mortality among historically marginalized groups, such as African  
42 American, Hispanic and Asian populations. [27, 28] studies show that mortality due to COVID-19  
43 is associated with socioeconomic class. [29–31] Black, Asian and minority ethnic (BAME)  
44 backgrounds represented one-third of the ICU admission in UK hospitals, while Somali  
45 immigrants living in Norway had a ten times higher rate of infection compared to the non-  
46 immigrants. [32, 33] Those who are minorities may not be aware of their underlying conditions  
47 due to barriers in accessing primary care and might be at high risk of developing more severe  
48 symptoms during this pandemic situation. [34, 35]



6

1  
2  
3  
4  
5 It is imperative to focus on SDOH during the COVID-19 pandemic to better understand  
6 preventable health inequalities and to improve health outcomes. As such, there is an immediate  
7 need to comprehend the social determinants of COVID-19 transmission and outcomes to  
8 decrease human sufferings and save lives.[36] In addition to known clinical risk factors,  
9 knowledge of social risk factors will help policymakers and healthcare decision-makers to  
10 prioritize groups who are most at-risk during the COVID-19 pandemic and to formulate health  
11 messages according.  
12  
13  
14  
15  
16  
17  
18  
19

### 20 **Objectives**

- 21 1. To find the impact of social determinants of health (SDOH) on the transmission and outcomes  
22 of COVID-19.  
23
- 24 2. To explore the geographic variations of SDOH on transmission and outcomes of COVID-19.  
25  
26  
27

### 28 **METHODS**

29 This protocol is registered with the International Prospective Register of Systematic Reviews  
30 (PROSPERO) under the registration number CRD42021228818 and follows the Preferred  
31 Reporting Items for Systematic Reviews and Meta-Analysis (PRISMA) guidelines,[37] as shown in  
32  
33  
34  
35  
36 **Figure 1.**  
37  
38  
39  
40  
41  
42  
43  
44  
45  
46  
47  
48  
49  
50  
51  
52  
53  
54  
55  
56  
57  
58  
59  
60

7

1  
2  
3  
4  
5  
6  
7  
8  
9  
10  
11  
12  
13  
14  
15  
16  
17  
18  
19  
20  
21  
22  
23  
24  
25  
26  
27  
28  
29  
30  
31  
32  
33  
34  
35  
36  
37  
38  
39  
40  
41  
42  
43  
44  
45  
46  
47  
48  
49  
50  
51  
52  
53  
54  
55  
56  
57  
58  
59  
60

**Figure 1: PRISMA 2009 Flow Diagram**

For peer review only

8

## Eligibility criteria

A summary of eligibility criteria is shown in **Table 1**.

### Types of studies:

The types of studies that will be considered in this systematic review will include empirical quantitative studies following prospective and retrospective cohort, case-control, cross-sectional, pre-post designs, and modeling studies that report statistical relationships between exposures of interest (i.e., social determinants of health) and COVID-19 transmission and outcomes. We will only include studies published in the English language. Qualitative studies, reviews, narrative reviews, systematic reviews, meta-analyses, pharmacological and biochemical studies, animal model studies, conference abstracts, conference proceedings, and theses/dissertations will not be included in this systematic review. Simulation modeling, which does not report new empirical data, opinion literature, including commentaries, editorials, and analyses that discuss COVID-19 regarding equity, social determinants, and/or vulnerable populations, will also be excluded from the review.

### Types of study population:

Studies in this review will include populations of all ages, ethnicity, gender, and geographic location. We will consider any population that has been tested positive for COVID-19.

### Types of outcome measures:

Studies will be included if they use a measure for social determinants of health that affect the transmission and outcomes (confirmed positive case, hospitalization, and mortality) of COVID-19. We will use Healthy People 2020 and PROGRESS-Plus to classify our definition of social determinants of health.[38, 39] Healthy People 2020 addresses five SDOH; economic stability, education, social and community context, health and health care, neighborhood, and built environment. PROGRESS-Plus refers to the place of residence, race/ethnicity/culture/language, occupation, gender, religion, education, socioeconomic status, and social capital. Plus refers to

9

personal characteristics associated with discrimination (e.g., age, disability), features of relationships (e.g., smoking parents, excluded from school), and time-dependent relationships (e.g., leaving the hospital, respite care, other instances where a person may be temporarily at a disadvantage).

**Table 1: Inclusion and exclusion criteria for the review**

| Inclusion criteria                                                                                                                                                                                                                                                                                                                                                                                                                                                                                                                                                                                                                                                                                                                                                          | Exclusion criteria                                                                                                                                                                                                                                                                                                                                                                                                                                                                                                                                                                                                                                                                                                                                                                                                                                |
|-----------------------------------------------------------------------------------------------------------------------------------------------------------------------------------------------------------------------------------------------------------------------------------------------------------------------------------------------------------------------------------------------------------------------------------------------------------------------------------------------------------------------------------------------------------------------------------------------------------------------------------------------------------------------------------------------------------------------------------------------------------------------------|---------------------------------------------------------------------------------------------------------------------------------------------------------------------------------------------------------------------------------------------------------------------------------------------------------------------------------------------------------------------------------------------------------------------------------------------------------------------------------------------------------------------------------------------------------------------------------------------------------------------------------------------------------------------------------------------------------------------------------------------------------------------------------------------------------------------------------------------------|
| <ul style="list-style-type: none"> <li>▪ Empirical-based observational quantitative studies such as cross-sectional, case-control, prospective and retrospective cohort, pre-post designs, and modeling studies</li> <li>▪ Studies covering all geographical locations</li> <li>▪ Studies in the English language only</li> <li>▪ Studies covering people of all age groups</li> <li>▪ Studies that include SDOH listed in PROGRESS-Plus &amp; Healthy People 2020</li> <li>▪ Studies that include any COVID-19 positive population</li> <li>▪ Studies that include populations tested positive for COVID-19, with underlying co-morbidities</li> <li>▪ Studies that include a population that required hospitalization or resulted in mortality due to COVID-19</li> </ul> | <ul style="list-style-type: none"> <li>▪ Studies in Non-English language</li> <li>▪ Qualitative studies, simulation modeling studies (without new empirical data), review studies, systematic review, review of the systematic review, meta-analysis, narrative reviews, conference abstracts, proceedings, thesis</li> <li>▪ Pharmacological and biochemical studies, animal model studies,</li> <li>▪ Opinion literature, including commentaries, editorials, brief reports, perspectives, and analyses</li> <li>▪ Studies that include COVID-19 disease outcome among special populations (such as patients with HIV, prisoners, cancer patients, etc.)</li> <li>▪ Studies that include laboratory measures and radiologic findings of COVID-19 diagnosis.</li> <li>▪ Articles with missing descriptions of findings and/or results</li> </ul> |

10

### Search strategy

We undertook a comprehensive literature search to locate both published and unpublished literature. We searched articles published from January 1, 2019, to December 31, 2021, in three electronic bibliographic databases (MEDLINE via PubMed, Embase and Scopus), as well as the WHO COVID-19 Global Research on coronavirus disease database, to ensure results focused on the novel COVID-19 pandemic and retrieve pre-print articles. Our search strategy was based on the published Ovid Embase COVID-19 search strategy translated for use in the searched databases.[40] The full, detailed search strategy is available in **Supplement 1**. Following the search, all identified citations were imported into EndNote X9 (Clarivate Analytics, PA, USA), and duplicates were removed. Deduplicated results were exported to an Excel spreadsheet for screening. The reference lists of all included studies will be then further reviewed for eligible studies.

### Study records

Selection process:

Based on the title and abstract (where available), ten (10) researchers initially reviewed and assessed potential articles for eligibility that meet inclusion criteria, while maintaining a low threshold for consideration for further review. The same researchers will screen the full text of the potential articles for inclusion. We will resolve the disagreement or uncertainty regarding the eligibility of particular studies through discussion by two independent researchers.

### ***Data management and collection:***

Ten (10) researchers will work on data extraction using a piloted data extraction tool, and the extracted data will be reviewed by a supervisor for errors.

Data to be collected:

- a. Study details (title, year of publication, author, abstract, study design, country, region)
- b. Study population characteristics (age, sex...)
- c. Sampling strategy and sample size

11

1  
2  
3 d. SDOH including participant demographics (place of residence, occupation,  
4 race/ethnicity/culture/language, education, religion, social capital, socioeconomic status,  
5 economic stability, education, social and community contexts, health and health care access,  
6 neighborhood and built environment).[38, 39]

7  
8  
9  
10 e. Outcome severity of COVID-19  
11  
12  
13

## 14 **OUTCOMES**

15  
16 This systematic review will focus on SDOH that impact the transmission and outcomes of COVID-  
17 19. We will also look for the geographical variations of these outcomes from the selected articles  
18 for this review. The following outcomes will be examined:  
19  
20

- 21 a. Positive COVID-19 cases  
22  
23 b. Hospitalization due to COVID-19 that includes regular bed patients admission, High  
24 Dependency Unit (HDU) patient admission, Intensive Care Unit (ICU) patient admission  
25  
26 c. Mortality due to COVID-19  
27  
28  
29

## 30 **RISK OF BIAS**

31  
32 To assess the quality of included observational studies, we will use a modified version of the  
33 Newcastle Ottawa Scale.[41] Two reviewers will independently assess each study, with  
34 discrepancies resolved by agreement or a third independent assessor if such agreement cannot  
35 be achieved.  
36  
37  
38  
39  
40

## 41 **DATA SYNTHESIS & ANALYSIS**

42  
43 This review is broad and exploratory in nature, and therefore, a meta-analysis of the effect  
44 estimate is not planned, but data will be evaluated for the possibility of conducting a meta-  
45 analysis. To avoid the shortcomings in the reporting of narrative synthesis, we will follow the  
46 Synthesis without Meta-Analysis (SWiM) reporting standards.[42] We will tabulate the results  
47 and narrate the summary of findings for each SDOH identified in this review. Additionally, we will  
48 prepare at least three tables consisting of the study characteristics, participant characteristics,  
49 and a summary of findings that describes study setting, size, methodology, primary outcomes,  
50  
51  
52  
53  
54  
55  
56  
57  
58  
59  
60

12

1  
2  
3 secondary outcomes, summary statistics, and/or statistical results (risk ratios, odds ratios, risk  
4 differences, mean differences, standardized mean differences, the ratio of means), and  
5 relationship to SDOH.  
6  
7  
8  
9

## 10 **DISCUSSION**

11  
12 Our systematic review will focus on the role that social determinants of health play in the  
13 transmission and outcomes of COVID-19. We hope that the concluded review will provide  
14 evidence to determine the impact and variability of social determinants of health associated with  
15 SARS-CoV-2 infection and the dynamics of transmission and outcomes. This protocol will guide  
16 the review homogeneously and methodologically. Our systematic review will address a gap in  
17 the COVID-19 literature, by exploring not only the impact social determinants of health have on  
18 the transmission and outcomes of the disease but also by exploring the global geographical  
19 differences of SDOH and its impact on the COVID-19 pandemic. Through this review, we hope to  
20 provide an empirical understanding of the diverse social determinants of COVID-19, which could  
21 appraise the global pandemic response efforts as well as provide comprehensive evidence for  
22 future public health policy implications.  
23  
24  
25  
26  
27  
28  
29  
30  
31  
32  
33

## 34 **PATIENT/PUBLIC INVOLVEMENT**

35  
36 There will be no patient or public involvement in this study.  
37  
38  
39

## 40 **ETHICS AND DISSEMINATION**

41  
42 As the data included in this review have been published or obtained from publicly available  
43 sources, ethical approval is not required. We will submit the full systematic review manuscript to  
44 a peer-reviewed journal and will present the study results at a national conference.  
45  
46  
47  
48

## 49 **AUTHOR CONTRIBUTIONS**

50  
51 All authors have contributed equally to the design and conceptualization of this review. MA, AW,  
52 FNR, FRO, SS, SR, CAM, and LI drafted the manuscript and protocol with UKS, FF, SRM, and LF as  
53 editors. LF developed the search strategy with input from UKS, FF, and SRM concerning keywords  
54  
55  
56  
57  
58  
59  
60

13

1  
2  
3 and databases. All review methods were planned and discussed with the authors, with LF acting  
4 as a methodological mentor.  
5  
6  
7

#### 8 **FUNDING**

9  
10 All authors declare that they have not received any grant/fund for this research from any source.  
11  
12

#### 13 **COMPETING INTERESTS**

14  
15 Authors declare that they have no competing interests.  
16  
17

#### 18 **PATIENT CONSENT FOR PUBLICATION**

19  
20 Not required  
21  
22  
23  
24  
25  
26  
27  
28  
29  
30  
31  
32  
33  
34  
35  
36  
37  
38  
39  
40  
41  
42  
43  
44  
45  
46  
47  
48  
49  
50  
51  
52  
53  
54  
55  
56  
57  
58  
59  
60



14

**REFERENCES**

- 1 WHO Coronavirus (COVID-19) Dashboard | WHO Coronavirus (COVID-19) Dashboard With Vaccination Data. <https://covid19.who.int/> (accessed 6 May 2021).
- 2 Abrams EM, Szeffler SJ. COVID-19 and the impact of social determinants of health. *Lancet Respir. Med.* 2020;8:659–61. doi:10.1016/S2213-2600(20)30234-4
- 3 WHO | Social determinants of health.
- 4 Marmot M, Allen JJ. Social determinants of health equity. *Am. J. Public Health.* 2014;104. doi:10.2105/AJPH.2014.302200
- 5 Preventable deaths and deprivation | The Health Foundation. <https://www.health.org.uk/news-and-comment/charts-and-infographics/preventable-death-and-deprivation> (accessed 14 Apr 2021).
- 6 WHO | Part Two. The urgent need for action. *WHO Published Online First:* 2015. [http://www.who.int/chp/chronic\\_disease\\_report/part2\\_ch2/en/](http://www.who.int/chp/chronic_disease_report/part2_ch2/en/) (accessed 15 Apr 2021).
- 7 Deaths involving COVID-19 by local area and socioeconomic deprivation - Office for National Statistics. <https://www.ons.gov.uk/peoplepopulationandcommunity/birthsdeathsandmarriages/deaths/bulletins/deathsinvolvingcovid19bylocalareasanddeprivation/deathsoccurringbetween1marchand17april> (accessed 25 Apr 2021).
- 8 Adhikari S, Pantaleo NP, Feldman JM, *et al.* Assessment of Community-Level Disparities in Coronavirus Disease 2019 (COVID-19) Infections and Deaths in Large US Metropolitan Areas. *JAMA Netw open* 2020;3:e2016938. doi:10.1001/jamanetworkopen.2020.16938
- 9 Lower income people, new immigrants at higher COVID-19 risk in Toronto, data suggests | CBC News. <https://www.cbc.ca/news/canada/toronto/low-income-immigrants-covid-19-infection-1.5566384> (accessed 25 Apr 2021).
- 10 Millett GA, Jones AT, Benkeser D, *et al.* Assessing differential impacts of COVID-19 on black communities. *Ann Epidemiol* 2020;47:37–44. doi:10.1016/j.annepidem.2020.05.003
- 11 Baqui P, Bica I, Marra V, *et al.* Ethnic and regional variations in hospital mortality from

15

- 1  
2  
3 COVID-19 in Brazil: a cross-sectional observational study. *Lancet Glob Heal*  
4 2020;8:e1018–26. doi:10.1016/S2214-109X(20)30285-0  
5  
6  
7 12 Martins-Filho PR, Araújo BCL, Sposato KB, *et al.* Racial disparities in covid-19-related  
8 deaths in brazil: Black lives matter? *J. Epidemiol.* 2021;31:239–40.  
9 doi:10.2188/jea.JE20200589  
10  
11  
12 13 Wong DWS, Li Y. Spreading of COVID-19: Density matters. *PLoS One* 2020;15:e0242398.  
13 doi:10.1371/journal.pone.0242398  
14  
15  
16 14 Coronavirus: In dense Bangladesh, social distancing a tough task | Coronavirus pandemic  
17 News | Al Jazeera. [https://www.aljazeera.com/news/2020/3/20/coronavirus-in-dense-](https://www.aljazeera.com/news/2020/3/20/coronavirus-in-dense-bangladesh-social-distancing-a-tough-task)  
18 [bangladesh-social-distancing-a-tough-task](https://www.aljazeera.com/news/2020/3/20/coronavirus-in-dense-bangladesh-social-distancing-a-tough-task) (accessed 25 Apr 2021).  
19  
20  
21 15 For India’s slum dwellers, social distancing will be impossible during Covid-19 lockdown -  
22 CNN. [https://edition.cnn.com/2020/03/30/india/india-coronavirus-social-distancing-intl-](https://edition.cnn.com/2020/03/30/india/india-coronavirus-social-distancing-intl-hnk/index.html)  
23 [hnk/index.html](https://edition.cnn.com/2020/03/30/india/india-coronavirus-social-distancing-intl-hnk/index.html) (accessed 25 Apr 2021).  
24  
25  
26  
27 16 Kawachi I, Berkman LF. Social Capital, Social Cohesion, and Health. In: *Social*  
28 *Epidemiology*. Oxford University Press 2015. 290–319.  
29 doi:10.1093/med/9780195377903.003.0008  
30  
31  
32 17 Ahmed SAKS, Ajisola M, Azeem K, *et al.* Impact of the societal response to COVID-19 on  
33 access to healthcare for non-COVID-19 health issues in slum communities of Bangladesh,  
34 Kenya, Nigeria and Pakistan: results of pre-COVID and COVID-19 lockdown stakeholder  
35 engagements. *BMJ Glob Heal* 2020;5:e003042. doi:10.1136/bmjgh-2020-003042  
36  
37  
38 18 Shadmi E, Chen Y, Dourado I, *et al.* Health equity and COVID-19: Global perspectives. *Int.*  
39 *J. Equity Health.* 2020;19:104. doi:10.1186/s12939-020-01218-z  
40  
41  
42  
43 19 Oliver A, Mossialos E. Equity of access to health care: Outlining the foundations for  
44 action. *J. Epidemiol. Community Health.* 2004;58:655–8. doi:10.1136/jech.2003.017731  
45  
46  
47 20 Bhatt J, Bathija P. Ensuring Access to Quality Health Care in Vulnerable Communities.  
48 *Acad Med* 2018;93:1271–5. doi:10.1097/ACM.0000000000002254  
49  
50  
51 21 Access to Health Services | Healthy People 2020.  
52 [https://www.healthypeople.gov/2020/topics-objectives/topic/social-determinants-](https://www.healthypeople.gov/2020/topics-objectives/topic/social-determinants-health/interventions-resources/access-to-health)  
53 [health/interventions-resources/access-to-health](https://www.healthypeople.gov/2020/topics-objectives/topic/social-determinants-health/interventions-resources/access-to-health) (accessed 15 Apr 2021).  
54  
55  
56  
57  
58  
59  
60

16

- 1  
2  
3 22 Health Disparities by Race and Ethnicity - Center for American Progress.  
4  
5 [https://www.americanprogress.org/issues/race/reports/2020/05/07/484742/health-](https://www.americanprogress.org/issues/race/reports/2020/05/07/484742/health-disparities-race-ethnicity/)  
6 [disparities-race-ethnicity/](https://www.americanprogress.org/issues/race/reports/2020/05/07/484742/health-disparities-race-ethnicity/) (accessed 23 Apr 2021).  
7  
8  
9 23 Buchmueller TC, Levinson ZM, Levy HG, *et al.* Effect of the affordable care act on racial  
10 and ethnic disparities in health insurance coverage. *Am J Public Health* 2016;106:1416–  
11 21. doi:10.2105/AJPH.2016.303155  
12  
13  
14 24 In U.S., 14% With Likely COVID-19 to Avoid Care Due to Cost.  
15  
16 <https://news.gallup.com/poll/309224/avoid-care-likely-covid-due-cost.aspx> (accessed 23  
17 Apr 2021).  
18  
19  
20 25 Transmission of SARS-CoV-2: implications for infection prevention precautions.  
21 [https://www.who.int/news-room/commentaries/detail/transmission-of-sars-cov-2-](https://www.who.int/news-room/commentaries/detail/transmission-of-sars-cov-2-implications-for-infection-prevention-precautions)  
22 [implications-for-infection-prevention-precautions](https://www.who.int/news-room/commentaries/detail/transmission-of-sars-cov-2-implications-for-infection-prevention-precautions) (accessed 23 Apr 2021).  
23  
24  
25 26 Sohn H. Racial and Ethnic Disparities in Health Insurance Coverage: Dynamics of Gaining  
26 and Losing Coverage Over the Life-Course. *Popul Res Policy Rev* 2017;36:181–201.  
27 doi:10.1007/s11113-016-9416-y  
28  
29  
30 27 COVID-19 Racial Disparities in Testing, Infection, Hospitalization, and Death: Analysis of  
31 Epic Patient Data | KFF. [https://www.kff.org/coronavirus-covid-19/issue-brief/covid-19-](https://www.kff.org/coronavirus-covid-19/issue-brief/covid-19-racial-disparities-testing-infection-hospitalization-death-analysis-epic-patient-data/)  
32 [racial-disparities-testing-infection-hospitalization-death-analysis-epic-patient-data/](https://www.kff.org/coronavirus-covid-19/issue-brief/covid-19-racial-disparities-testing-infection-hospitalization-death-analysis-epic-patient-data/)  
33 (accessed 25 Apr 2021).  
34  
35  
36  
37  
38 28 Risk for COVID-19 Infection, Hospitalization, and Death By Race/Ethnicity | CDC.  
39 [https://www.cdc.gov/coronavirus/2019-ncov/covid-data/investigations-](https://www.cdc.gov/coronavirus/2019-ncov/covid-data/investigations-discovery/hospitalization-death-by-race-ethnicity.html)  
40 [discovery/hospitalization-death-by-race-ethnicity.html](https://www.cdc.gov/coronavirus/2019-ncov/covid-data/investigations-discovery/hospitalization-death-by-race-ethnicity.html) (accessed 25 Apr 2021).  
41  
42  
43 29 Shahbazi F, Khazaei S. Socio-economic inequality in global incidence and mortality rates  
44 from coronavirus disease 2019: an ecological study. *New Microbes New Infect*  
45 2020;38:100762. doi:10.1016/j.nmni.2020.100762  
46  
47  
48  
49 30 Seligman B, Ferranna M, Bloom DE. Social determinants of mortality from COVID-19: A  
50 simulation study using NHANES. *PLOS Med* 2021;18:e1003490.  
51 doi:10.1371/journal.pmed.1003490  
52  
53  
54 31 Karmakar M, Lantz PM, Tipirneni R. Association of Social and Demographic Factors with  
55  
56  
57  
58  
59  
60

17

- 1  
2  
3 COVID-19 Incidence and Death Rates in the US. *JAMA Netw Open* 2021;4:e2036462–  
4 e2036462. doi:10.1001/jamanetworkopen.2020.36462  
5  
6  
7 32 Baumer T, Phillips E, Dhadda A, *et al*. Epidemiology of the First Wave of COVID-19 ICU  
8 Admissions in South Wales—The Interplay Between Ethnicity and Deprivation. *Front Med*  
9 2020;7:569714. doi:10.3389/fmed.2020.569714  
10  
11  
12 33 Indseth T, Grøslund M, Arnesen T, *et al*. COVID-19 among immigrants in Norway, notified  
13 infections, related hospitalizations and associated mortality: A register-based study.  
14 *Scand J Public Health* 2021;49:48–56. doi:10.1177/1403494820984026  
15  
16  
17 34 Germain S, Yong A. COVID-19 Highlighting Inequalities in Access to Healthcare in England:  
18 A Case Study of Ethnic Minority and Migrant Women. *Fem. Leg. Stud.* 2020;28:301–10.  
19 doi:10.1007/s10691-020-09437-z  
20  
21  
22  
23 35 Szczepura A. Access to health care for ethnic minority populations. *Postgrad. Med. J.*  
24 2005;81:141–7. doi:10.1136/pgmj.2004.026237  
25  
26  
27 36 Paremoer L, Nandi S, Serag H, *et al*. Covid-19 pandemic and the social determinants of  
28 health. *BMJ.* 2021;372. doi:10.1136/bmj.n129  
29  
30  
31 37 Page MJ, McKenzie JE, Bossuyt PM, *et al*. The PRISMA 2020 statement: an updated  
32 guideline for reporting systematic reviews. *BMJ* 2021;;n71. doi:10.1136/bmj.n71  
33  
34  
35 38 Social Determinants of Health | Healthy People 2020.  
36 [https://www.healthypeople.gov/2020/topics-objectives/topic/social-determinants-of-](https://www.healthypeople.gov/2020/topics-objectives/topic/social-determinants-of-health)  
37 [health](https://www.healthypeople.gov/2020/topics-objectives/topic/social-determinants-of-health) (accessed 15 Apr 2021).  
38  
39  
40 39 PROGRESS-Plus | Cochrane Equity.  
41 <https://methods.cochrane.org/equity/projects/evidence-equity/progress-plus> (accessed  
42 9 May 2021).  
43  
44  
45 40 Ovid Database Guide. <https://ospguides.ovid.com/OSPguides/medline.htm> (accessed 15  
46 Apr 2021).  
47  
48  
49 41 Ottawa Hospital Research Institute.  
50 [http://www.ohri.ca/programs/clinical\\_epidemiology/oxford.asp](http://www.ohri.ca/programs/clinical_epidemiology/oxford.asp) (accessed 3 Apr 2021).  
51  
52  
53 42 Campbell M, McKenzie JE, Sowden A, *et al*. Synthesis without meta-analysis (SWiM) in  
54 systematic reviews: Reporting guideline. *BMJ* 2020;368. doi:10.1136/bmj.l6890  
55  
56  
57  
58  
59  
60

1  
2  
3  
4  
5  
6  
7  
8  
9  
10  
11  
12  
13  
14  
15  
16  
17  
18  
19  
20  
21  
22  
23  
24  
25  
26  
27  
28  
29  
30  
31  
32  
33  
34  
35  
36  
37  
38  
39  
40  
41  
42  
43  
44  
45  
46  
47  
48  
49  
50  
51  
52  
53  
54  
55  
56  
57  
58  
59  
60

For peer review only

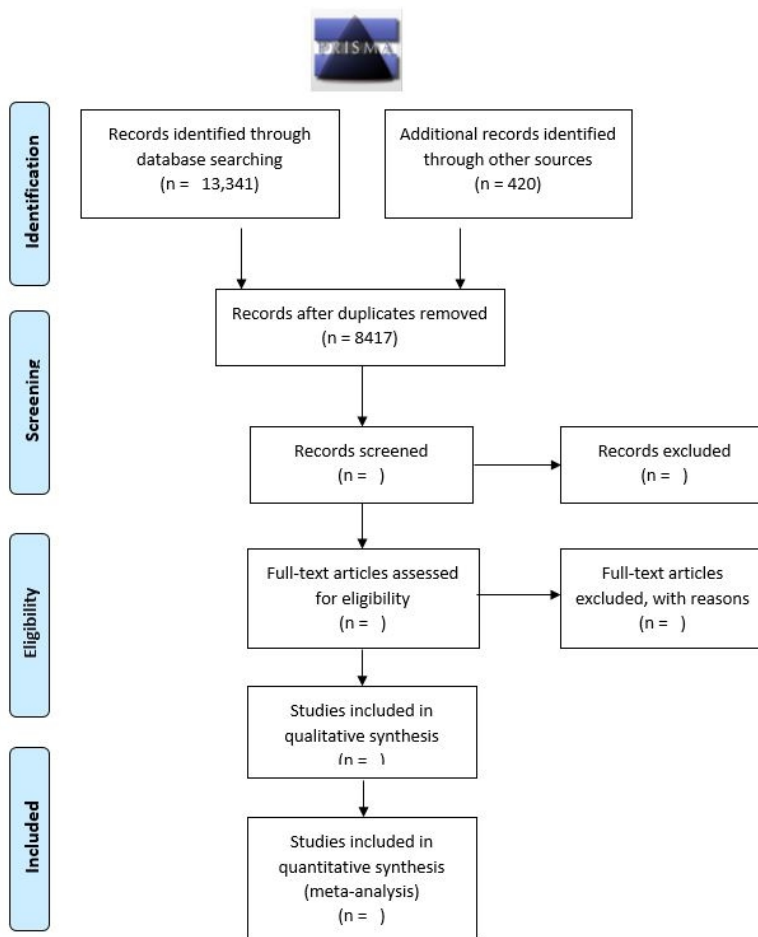

Figure 1: PRISMA 2009 Flow Diagram

Figure 1: PRISMA 2009 Flow Diagram

166x170mm (120 x 120 DPI)

1

2  
3  
4  
5  
6  
7  
8  
9  
10  
11  
12  
13  
14  
15  
16  
17  
18  
19  
20  
21  
22  
23  
24  
25  
26  
27  
28  
29  
30  
31  
32  
33  
34  
35  
36  
37  
38  
39  
40  
41  
42  
43  
44  
45  
46  
47  
48  
49  
50  
51  
52  
53  
54  
55  
56  
57  
58  
59  
60SUPPLEMENT 1  
Embase

|    |                                                                                                                                                                                                                                                                                                               |
|----|---------------------------------------------------------------------------------------------------------------------------------------------------------------------------------------------------------------------------------------------------------------------------------------------------------------|
| 13 | 'health care access'/de                                                                                                                                                                                                                                                                                       |
| 14 | ((acces* OR avail*) NEXT/2 (healthcare OR 'health care' OR 'health service*')):ti,ab,kw                                                                                                                                                                                                                       |
| 15 | 'socioeconomics'/exp                                                                                                                                                                                                                                                                                          |
| 16 | ('socioeconomic factors' OR 'health services accessibility'):ti,ab,kw,de                                                                                                                                                                                                                                      |
| 17 | (education* achieve* OR education* status):ti,ab,kw,de                                                                                                                                                                                                                                                        |
| 18 | 'health insurance'/de                                                                                                                                                                                                                                                                                         |
| 19 | 'unemployment'/de                                                                                                                                                                                                                                                                                             |
| 20 | 'social isolation'/exp                                                                                                                                                                                                                                                                                        |
| 21 | 'social determinant of health'/de                                                                                                                                                                                                                                                                             |
| 22 | 'social environment'/de                                                                                                                                                                                                                                                                                       |
| 23 | 'social exclusion'/de                                                                                                                                                                                                                                                                                         |
| 24 | ('health insurance' (standard* NEXT/1 living) OR 'social determinant*' OR unemployment OR 'social isolation' OR 'psychosocial deprivation' OR 'social environment' OR 'social exclusion' OR 'social marginali*ation'):ti,ab,kw                                                                                |
| 25 | ('social determinant? of health' OR SDOH OR SDH OR 'social deprivation' OR 'social disadvantage' OR 'financial difficult*' OR 'financial problem?' OR 'income difference*' OR indigent* OR 'insurance status' OR jobless OR 'job insecurity*' OR 'low income' OR marginali* OR 'occupation* status'):ti,ab,kw |
| 26 | (Poverty OR SES OR 'social disparit*' OR 'social environment' OR 'social exclusion' OR 'social factor?' OR 'social gradient?' OR 'social position?' OR 'social variation?' OR 'socioeconomic status' OR 'socioeconomic circumstances' OR 'socioeconomic gradient'):ti,ab,kw                                   |
| 27 | ('socioeconomic health differences' OR 'socioeconomic position' OR 'socioeconomic variable' OR underprivilege* OR unemployed OR unemployment OR uninsur* OR 'vulnerable population' OR 'vulnerable group?' OR 'vulnerable communit*' OR 'vulnerable people' OR 'vulnerable person?'):ti,ab,kw                 |
| 28 | ((socio* OR social*) NEXT/10 (predict* OR prognos* OR risk*)):ti,ab,kw                                                                                                                                                                                                                                        |

2

|    |                                                                                                              |
|----|--------------------------------------------------------------------------------------------------------------|
| 29 | #13 OR #14 OR #15 OR #16 OR #17 OR #18 OR #19 OR #20 OR #21 OR #22 OR #23 OR #24 OR #25 OR #26 OR #27 OR #28 |
| 30 | #12 AND #29                                                                                                  |

**PubMed**

|   |                                                                                                                                                                                                                                                                                                                                                                                                                                                                                                                                                 |
|---|-------------------------------------------------------------------------------------------------------------------------------------------------------------------------------------------------------------------------------------------------------------------------------------------------------------------------------------------------------------------------------------------------------------------------------------------------------------------------------------------------------------------------------------------------|
| 1 | "Coronavirus"[Mesh]                                                                                                                                                                                                                                                                                                                                                                                                                                                                                                                             |
| 2 | "Coronavirus Infections"[Mesh]                                                                                                                                                                                                                                                                                                                                                                                                                                                                                                                  |
| 3 | (coronavirus*[tw] OR corona virus*[tw] OR OC43[tw] OR NL63[tw] OR 22pE[tw] OR HKU1[tw] OR HCoV*[tw] OR ncov*[tw] OR covid*[tw] OR sars-cov*[tw] OR sarscov*[tw] OR Sars-coronavirus*[tw] OR Severe Acute Respiratory Syndrome Coronavirus*[tw])                                                                                                                                                                                                                                                                                                 |
| 4 | #1 OR #2 OR #3                                                                                                                                                                                                                                                                                                                                                                                                                                                                                                                                  |
| 5 | (MERS[tw] OR MERS-CoV[tw] OR Middle East respiratory syndrome[tw] OR camel*[tw] OR dromedary*[tw] OR equine[tw] OR coronary[tw] OR coronal[tw] OR covidence*[tw] OR covidien[tw] OR influenza virus[tw] OR HIV[tw] OR bovine[tw] OR calves[tw] OR TGEV[tw] OR feline[tw] OR porcine[tw] OR BCoV[tw] OR PEDV[tw] OR PDCoV[tw] OR FIPV[tw] OR FCoV[tw] OR SADS-CoV[tw] OR canine[tw] OR CCov[tw] OR zoonotic[tw] OR avian influenza[tw] OR H1N1[tw] OR H5N1[tw] OR H5N6[tw] OR IBV[tw] OR murine corona*[tw])                                     |
| 6 | #4 NOT #5                                                                                                                                                                                                                                                                                                                                                                                                                                                                                                                                       |
| 7 | ((((pneumonia[tw] OR covid*[tw] OR coronavirus*[tw] OR corona virus*[tw] OR ncov*[tw] OR 2019ncov[tw] OR sars*[tw]) OR "Pneumonia"[Mesh]) AND Wuhan[tw])                                                                                                                                                                                                                                                                                                                                                                                        |
| 8 | (coronavirus disease 2019[tw] OR 2019-ncov[tw] OR 2019nCoV[tw] OR ncov2019[tw] OR ncov19[tw] OR ncov-19[tw] OR HCoV-19[tw] OR 2019-novel CoV[tw] OR severe acute respiratory syndrome coronavirus 2[tw] OR sars2[tw] OR sars 2[tw] OR sars-cov2[tw] OR sars-cov-2[tw] OR sarscov2[tw] OR sarscov-2[tw] OR Sars-coronavirus2[tw] OR Sars-coronavirus-2[tw] OR SARS-CoV-19[tw] OR SARS-like coronavirus*[tw] OR coronavirus-19[tw] OR covid19[tw] OR covid-19[tw] OR covid 2019[tw] OR ((novel[tw] OR new[tw] OR nouveau[tw]) AND (CoV OR nCoV OR |



3

|    |                                                                                                                                                                                                                                                                                                                                                                                                         |
|----|---------------------------------------------------------------------------------------------------------------------------------------------------------------------------------------------------------------------------------------------------------------------------------------------------------------------------------------------------------------------------------------------------------|
|    | covid OR coronavirus*) OR ("corona virus" OR Pandemi*) OR coronavirus pandemic[tw] OR covid pandemic [tw] OR covid19 pandemic[tw] OR covid-19 pandemic[tw])                                                                                                                                                                                                                                             |
| 9  | "COVID-19" [Supplementary Concept]                                                                                                                                                                                                                                                                                                                                                                      |
| 10 | "severe acute respiratory syndrome coronavirus 2" [Supplementary Concept]                                                                                                                                                                                                                                                                                                                               |
| 11 | #7 OR #12 OR #9 OR #10                                                                                                                                                                                                                                                                                                                                                                                  |
| 12 | #6 OR #11                                                                                                                                                                                                                                                                                                                                                                                               |
| 13 | "Health Services Accessibility"[Mesh]                                                                                                                                                                                                                                                                                                                                                                   |
| 14 | (acces* healthcare[tw] OR acces* heath care[tw] OR acces* health service*[tw] OR avail* healthcare[tw] OR avail* health care[tw] OR avail* health service*[tw])                                                                                                                                                                                                                                         |
| 15 | "socioeconomic factors"[MeSH]                                                                                                                                                                                                                                                                                                                                                                           |
| 16 | (socioeconomic factors[tw] OR socioeconomic[tw] OR health services accessibility[tw])                                                                                                                                                                                                                                                                                                                   |
| 17 | (education* achieve*[tw] OR education* status[tw])                                                                                                                                                                                                                                                                                                                                                      |
| 18 | "Insurance, Health"[MeSH:NoExp]                                                                                                                                                                                                                                                                                                                                                                         |
| 19 | "Unemployment"[MeSH]                                                                                                                                                                                                                                                                                                                                                                                    |
| 20 | "Social Isolation"[Mesh]                                                                                                                                                                                                                                                                                                                                                                                |
| 21 | "Social Determinants of Health"[MeSH]                                                                                                                                                                                                                                                                                                                                                                   |
| 22 | "Social Environment"[Mesh:NoExp]                                                                                                                                                                                                                                                                                                                                                                        |
| 23 | "Social Marginalization"[Mesh]                                                                                                                                                                                                                                                                                                                                                                          |
| 24 | (health insurance[tw] OR "standard of living"[tw] OR social determinant*[tw] OR unemployment[tw] OR social isolation[tw] OR psychosocial deprivation[tw] OR social environment[tw] OR social exclusion[tw] OR social marginalization[tw] OR social marginalisation[tw])                                                                                                                                 |
| 25 | (social determinant of health[tw] OR social determinants of health[tw] OR SDOH[tw] OR SDH[tw] OR social deprivation[tw] OR social disadvantage[tw] OR financial difficult*[tw] OR financial problem[tw] OR financial problems[tw] OR income differences[tw] OR indigent[tw] OR insurance status[tw] OR jobless[tw] OR job insecurit*[tw] OR low income[tw] OR marginali*[tw] OR occupation* status[tw]) |

4

|    |                                                                                                                                                                                                                                                                                                                                                                                 |
|----|---------------------------------------------------------------------------------------------------------------------------------------------------------------------------------------------------------------------------------------------------------------------------------------------------------------------------------------------------------------------------------|
| 26 | (poverty[tw] OR SES[tw] OR social disparit*[tw] OR social factor[tw] OR social factors[tw] OR social gradient[tw] OR social gradients[tw] OR social position[tw] OR social positions[tw] OR social variation[tw] OR social variations[tw] OR socioeconomic status[tw] OR socioeconomic circumstance*[tw] OR socioeconomic gradient[tw])                                         |
| 27 | (socioeconomic health differences[tw] OR socioeconomic position[tw] OR socioeconomic variable[tw] OR underprivilege*[tw] OR unemployed[tw] OR uninsur*[tw] OR vulnerable population[tw] OR vulnerable populations[tw] OR vulnerable group[tw] OR vulnerable groups[tw] OR vulnerable communit*[tw] OR vulnerable people[tw] OR vulnerable person[tw] OR vulnerable persons[tw]) |
| 28 | (socio* predict*[tw] OR socio* prognos*[tw] OR socio* risk*[tw] OR social*predict*[tw] OR social* prognos*[tw] OR social* risk*[tw])                                                                                                                                                                                                                                            |
| 29 | #13 OR #14 OR #15 OR #16 OR #17 OR #18 OR #19 OR #20 OR #21 OR #22 OR #23 OR #24 OR #25 OR #26 OR #27 OR #28                                                                                                                                                                                                                                                                    |
| 30 | #12 AND #29                                                                                                                                                                                                                                                                                                                                                                     |

### Scopus

|   |                                                                                                                                                                                                                                                                                                                                                                                                                  |
|---|------------------------------------------------------------------------------------------------------------------------------------------------------------------------------------------------------------------------------------------------------------------------------------------------------------------------------------------------------------------------------------------------------------------|
| 1 | TITLE-ABS-KEY(coronavirus* OR "corona virus*" OR OC43 OR NL63 OR 22pE OR HKU1 OR HCoV* OR ncov* OR covid* OR sars-cov* OR sarscov* OR Sars-coronavirus* OR "Severe Acute Respiratory Syndrome Coronavirus*" OR coronavirnae OR "coronavirus infection")                                                                                                                                                          |
| 2 | TITLE-ABS-KEY(SARS or SARS-CoV OR MERS OR MERS-CoV OR "Middle East respiratory syndrome" OR camel* OR dromedary* OR equine OR coronary OR coronal OR covidence* OR covidien OR influenza virus OR HIV or bovine OR calves OR TGEV OR feline OR porcine OR BCoV OR PEDV OR PDCoV OR FIPV OR FCoV OR SADS-CoV OR canine or CCov OR zoonotic OR avian influenza OR H1N1 OR H5N1 OR H5N6 OR IBV OR "murine corona*") |
| 3 | #1 NOT #2                                                                                                                                                                                                                                                                                                                                                                                                        |
| 4 | TITLE-ABS-KEY((pneumonia OR covid* OR coronavirus* OR "corona virus*" OR ncov* OR 2019-ncov OR sars*) AND Wuhan)                                                                                                                                                                                                                                                                                                 |

5

|    |                                                                                                                                                                                                                                                                                                                                                                                                                                                                                                                                                                                                              |
|----|--------------------------------------------------------------------------------------------------------------------------------------------------------------------------------------------------------------------------------------------------------------------------------------------------------------------------------------------------------------------------------------------------------------------------------------------------------------------------------------------------------------------------------------------------------------------------------------------------------------|
| 5  | TITLE-ABS-KEY(("coronavirus disease 2019" OR 2019-ncov OR 2019nCoV OR ncov2019 OR ncov19 OR ncov-19 OR HCoV-19 OR "2019-novel CoV" OR "severe acute respiratory syndrome coronavirus 2" OR sars2 OR "sars 2" OR sars-cov2 OR sars-cov-2 OR sarscov2 OR sarscov-2 OR Sars-coronavirus2 OR Sars-coronavirus-2 OR SARS-CoV-19 OR "SARS-like coronavirus*" OR coronavirus-19 OR covid19 OR covid-19 OR "covid 2019" OR ((novel OR new OR nouveau) W/2 (CoV OR nCoV OR covid OR coronavirus* OR "corona virus" OR Pandemi*2)) OR ((covid OR covid19 OR covid-19) AND pandemic*2) OR (coronavirus* AND pneumonia)) |
| 6  | #3 OR #4 OR #5                                                                                                                                                                                                                                                                                                                                                                                                                                                                                                                                                                                               |
| 7  | TITLE-ABS-KEY((acces* OR avail*) W/2 (healthcare OR "health care" OR "health service*"))                                                                                                                                                                                                                                                                                                                                                                                                                                                                                                                     |
| 8  | TITLE-ABS-KEY("socioeconomic factors" OR "health services accessibility")                                                                                                                                                                                                                                                                                                                                                                                                                                                                                                                                    |
| 9  | TITLE-ABS-KEY ("education* achieve*" OR "education* status")                                                                                                                                                                                                                                                                                                                                                                                                                                                                                                                                                 |
| 10 | TITLE-ABS-KEY("health insurance" (standard* W/1 living) OR "social determinant*" OR unemployment OR "social isolation" OR "psychosocial deprivation" OR "rural health" OR "social environment" OR "social exclusion" OR "social marginali?ation")                                                                                                                                                                                                                                                                                                                                                            |
| 11 | TITLE-ABS-KEY("social deprivation" OR "social disadvantage" OR "financial difficult*" OR "social determinant* of health" OR SDOH OR SDH OR "financial problem?" OR "income difference*" OR indigent* OR "insurance status" OR jobless OR "job insecurity*" OR "low income" OR marginali* OR "occupation* status")                                                                                                                                                                                                                                                                                            |
| 12 | TITLE-ABS-KEY(poverty OR SES OR "social disparit*" OR "social environment" OR "social exclusion" OR "social factor?" OR "social gradient?" OR "social position?" OR "social variation?" OR "socioeconomic status" OR "socioeconomic circumstances" OR "socioeconomic gradient")                                                                                                                                                                                                                                                                                                                              |
| 13 | TITLE-ABS-KEY("socioeconomic health differences" OR "socioeconomic position" OR "socioeconomic variable" OR underprivilege* OR unemployed OR unemployment OR uninsur* OR "vulnerable population" OR "vulnerable group?" OR "vulnerable communit*" OR "vulnerable people" OR "vulnerable person?")                                                                                                                                                                                                                                                                                                            |
| 14 | TITLE-ABS-KEY((socio* OR social*) W/10 (predict* OR prognos* OR risk*))                                                                                                                                                                                                                                                                                                                                                                                                                                                                                                                                      |

6

|    |                                                   |
|----|---------------------------------------------------|
| 15 | #7 OR #8 OR #9 OR #10 OR #11 OR #12 OR #13 OR #14 |
| 16 | #6 AND #15                                        |

**WHO Database**

|   |                                                                                                                                                                                                                                                                                                                                               |
|---|-----------------------------------------------------------------------------------------------------------------------------------------------------------------------------------------------------------------------------------------------------------------------------------------------------------------------------------------------|
| 1 | (acces* healthcare OR acces* heath care OR acces* health service* OR avail* healthcare OR avail* health care OR avail* health service*)                                                                                                                                                                                                       |
| 2 | ("socioeconomic factors" OR "health services accessibility")                                                                                                                                                                                                                                                                                  |
| 3 | (education* achieve* OR education* status)                                                                                                                                                                                                                                                                                                    |
| 4 | ("health insurance" OR social determinant* OR unemployment OR "social isolation" OR "psychosocial deprivation" OR "social environment" OR "social exclusion" OR social marginali?ation)                                                                                                                                                       |
| 5 | ("social deprivation" OR "social disadvantage" OR financial difficult* OR "social determinants of health" OR SDOH OR SDH OR "financial problem" OR "financial problems" OR "income difference" OR "income differences" OR indigent* OR "insurance status" OR jobless OR "job insecurity" OR "low income" OR marginali* OR occupation* status) |
| 6 | (poverty OR SES OR social disparit* OR "social environment" OR "social exclusion" OR "social factor" OR "social factors" OR "social gradient" OR "social position" OR "social positions" OR "social variation" OR "social variations" OR "socioeconomic status" OR "socioeconomic circumstances" OR "socioeconomic gradient")                 |
| 7 | ("socioeconomic health differences" OR "socioeconomic position" OR "socioeconomic variable" OR underprivilege* OR unemployed OR unemployment OR uninsur* OR "vulnerable population" OR "vulnerable group" OR "vulnerable groups" OR "vulnerable community" OR "vulnerable communities" OR "vulnerable people" OR "vulnerable person")         |
| 8 | #1 OR #2 OR #3 OR #4 OR #5 OR #6 OR #7                                                                                                                                                                                                                                                                                                        |

**PRISMA-P (Preferred Reporting Items for Systematic review and Meta-Analysis Protocols) 2015 checklist: recommended items to address in a systematic review protocol\***

| Section and topic                 | Item No | Checklist item                                                                                                                                                                                                                           |
|-----------------------------------|---------|------------------------------------------------------------------------------------------------------------------------------------------------------------------------------------------------------------------------------------------|
| <b>ADMINISTRATIVE INFORMATION</b> |         |                                                                                                                                                                                                                                          |
| Title:                            |         |                                                                                                                                                                                                                                          |
| Identification                    | 1a      | Identify the report as a protocol of a systematic review (page 1)                                                                                                                                                                        |
| Update                            | 1b      | If the protocol is for an update of a previous systematic review, identify as such (N/A)                                                                                                                                                 |
| Registration                      | 2       | If registered, provide the name of the registry (such as PROSPERO) and registration number (page 3)                                                                                                                                      |
| Authors:                          |         |                                                                                                                                                                                                                                          |
| Contact                           | 3a      | Provide name, institutional affiliation, e-mail address of all protocol authors; provide physical mailing address of corresponding author (page 1)                                                                                       |
| Contributions                     | 3b      | Describe contributions of protocol authors and identify the guarantor of the review (page 12/13)                                                                                                                                         |
| Amendments                        | 4       | If the protocol represents an amendment of a previously completed or published protocol, identify as such and list changes; otherwise, state plan for documenting important protocol amendments (N/A)                                    |
| Support:                          |         |                                                                                                                                                                                                                                          |
| Sources                           | 5a      | Indicate sources of financial or other support for the review (page 13)                                                                                                                                                                  |
| Sponsor                           | 5b      | Provide name for the review funder and/or sponsor (page 13)                                                                                                                                                                              |
| Role of sponsor or funder         | 5c      | Describe roles of funder(s), sponsor(s), and/or institution(s), if any, in developing the protocol (N/A)                                                                                                                                 |
| <b>INTRODUCTION</b>               |         |                                                                                                                                                                                                                                          |
| Rationale                         | 6       | Describe the rationale for the review in the context of what is already known (page 4/5/6)                                                                                                                                               |
| Objectives                        | 7       | Provide an explicit statement of the question(s) the review will address with reference to participants, interventions, comparators, and outcomes (PICO) (page 6)                                                                        |
| <b>METHODS</b>                    |         |                                                                                                                                                                                                                                          |
| Eligibility criteria              | 8       | Specify the study characteristics (such as PICO, study design, setting, time frame) and report characteristics (such as years considered, language, publication status) to be used as criteria for eligibility for the review (page 8/9) |
| Information sources               | 9       | Describe all intended information sources (such as electronic databases, contact with study authors, trial registers or other grey literature sources) with planned dates of coverage (page 10)                                          |
| Search strategy                   | 10      | Present draft of search strategy to be used for at least one electronic database, including planned limits, such that it could be repeated (page 10, Supplement 1)                                                                       |
| Study records:                    |         |                                                                                                                                                                                                                                          |
| Data management                   | 11a     | Describe the mechanism(s) that will be used to manage records and data throughout the review (page 10/11)                                                                                                                                |

|                                    |     |                                                                                                                                                                                                                                                        |
|------------------------------------|-----|--------------------------------------------------------------------------------------------------------------------------------------------------------------------------------------------------------------------------------------------------------|
| Selection process                  | 11b | State the process that will be used for selecting studies (such as two independent reviewers) through each phase of the review (that is, screening, eligibility and inclusion in meta-analysis) (page 10)                                              |
| Data collection process            | 11c | Describe planned method of extracting data from reports (such as piloting forms, done independently, in duplicate), any processes for obtaining and confirming data from investigators (page 10)                                                       |
| Data items                         | 12  | List and define all variables for which data will be sought (such as PICO items, funding sources), any pre-planned data assumptions and simplifications (page 11)                                                                                      |
| Outcomes and prioritization        | 13  | List and define all outcomes for which data will be sought, including prioritization of main and additional outcomes, with rationale (page 11)                                                                                                         |
| Risk of bias in individual studies | 14  | Describe anticipated methods for assessing risk of bias of individual studies, including whether this will be done at the outcome or study level, or both; state how this information will be used in data synthesis (page 11)                         |
| Data synthesis                     | 15a | Describe criteria under which study data will be quantitatively synthesised (page 11/12)                                                                                                                                                               |
|                                    | 15b | If data are appropriate for quantitative synthesis, describe planned summary measures, methods of handling data and methods of combining data from studies, including any planned exploration of consistency (such as $I^2$ , Kendall's $\tau$ ) (N/A) |
|                                    | 15c | Describe any proposed additional analyses (such as sensitivity or subgroup analyses, meta-regression) (N/A)                                                                                                                                            |
|                                    | 15d | If quantitative synthesis is not appropriate, describe the type of summary planned (page 11/12)                                                                                                                                                        |
| Meta-bias(es)                      | 16  | Specify any planned assessment of meta-bias(es) (such as publication bias across studies, selective reporting within studies) (at page 8)                                                                                                              |
| Confidence in cumulative evidence  | 17  | Describe how the strength of the body of evidence will be assessed (such as GRADE) (page 6/7)                                                                                                                                                          |

**\* It is strongly recommended that this checklist be read in conjunction with the PRISMA-P Explanation and Elaboration (cite when available) for important clarification on the items. Amendments to a review protocol should be tracked and dated. The copyright for PRISMA-P (including checklist) is held by the PRISMA-P Group and is distributed under a Creative Commons Attribution Licence 4.0.**

*From: Shamseer L, Moher D, Clarke M, Ghersi D, Liberati A, Petticrew M, Shekelle P, Stewart L, PRISMA-P Group. Preferred reporting items for systematic review and meta-analysis protocols (PRISMA-P) 2015: elaboration and explanation. BMJ. 2015 Jan 2;349(jan02 1):g7647.*

# BMJ Open

## The impact and variability of social determinants of health on the transmission and outcomes of COVID-19 across the world: a systematic review protocol

|                                 |                                                                                                                                                                                                                                                                                                                                                                                                                                                                                                                                                                                                                                                                                                                                                                                                                                                                                                                                                                                                                                                                                                                                                                                                                                                                                                                    |
|---------------------------------|--------------------------------------------------------------------------------------------------------------------------------------------------------------------------------------------------------------------------------------------------------------------------------------------------------------------------------------------------------------------------------------------------------------------------------------------------------------------------------------------------------------------------------------------------------------------------------------------------------------------------------------------------------------------------------------------------------------------------------------------------------------------------------------------------------------------------------------------------------------------------------------------------------------------------------------------------------------------------------------------------------------------------------------------------------------------------------------------------------------------------------------------------------------------------------------------------------------------------------------------------------------------------------------------------------------------|
| Journal:                        | <i>BMJ Open</i>                                                                                                                                                                                                                                                                                                                                                                                                                                                                                                                                                                                                                                                                                                                                                                                                                                                                                                                                                                                                                                                                                                                                                                                                                                                                                                    |
| Manuscript ID                   | bmjopen-2021-053481.R1                                                                                                                                                                                                                                                                                                                                                                                                                                                                                                                                                                                                                                                                                                                                                                                                                                                                                                                                                                                                                                                                                                                                                                                                                                                                                             |
| Article Type:                   | Protocol                                                                                                                                                                                                                                                                                                                                                                                                                                                                                                                                                                                                                                                                                                                                                                                                                                                                                                                                                                                                                                                                                                                                                                                                                                                                                                           |
| Date Submitted by the Author:   | 05-Nov-2021                                                                                                                                                                                                                                                                                                                                                                                                                                                                                                                                                                                                                                                                                                                                                                                                                                                                                                                                                                                                                                                                                                                                                                                                                                                                                                        |
| Complete List of Authors:       | Abedin, Minhazul; Centre for Injury Prevention and Research Bangladesh, Public Health Sciences<br>Wahab, Abrar; Centre for Injury Prevention and Research Bangladesh, Public Health Sciences<br>Rahman, Farah Naz; Centre for Injury Prevention and Research Bangladesh, Public Health Sciences<br>Omi, Fardina ; Bangladesh University of Health Sciences, Noncommunicable Diseases<br>Shareen, Saadia ; Independent University, Department of Life Sciences, School of Environment and Life Sciences<br>Rakhshanda, Shagoofa; Centre for Injury Prevention and Research Bangladesh, Public Health Sciences<br>Islam, Labida; Centre for Injury Prevention and Research Bangladesh, Public Health Sciences<br>Mayaboti, Cinderella ; Centre for Injury Prevention and Research Bangladesh, Public Health Sciences<br>Saha, Uttam ; Centre for Injury Prevention and Research Bangladesh, Public Health Sciences<br>Faruque, Fazlay; The University of Mississippi Medical Center, Department of Preventive Medicine, School of Population Health<br>Fletcher, Lauren; The University of Mississippi Medical Center, Rowland Medical Library<br>Mashreky, Saidur; Centre for Injury Prevention and Research Bangladesh, Public Health Sciences; Bangladesh University of Health Sciences, Noncommunicable Diseases |
| <b>Primary Subject Heading</b>: | Public health                                                                                                                                                                                                                                                                                                                                                                                                                                                                                                                                                                                                                                                                                                                                                                                                                                                                                                                                                                                                                                                                                                                                                                                                                                                                                                      |
| Secondary Subject Heading:      | Epidemiology, Infectious diseases, Sociology                                                                                                                                                                                                                                                                                                                                                                                                                                                                                                                                                                                                                                                                                                                                                                                                                                                                                                                                                                                                                                                                                                                                                                                                                                                                       |
| Keywords:                       | Epidemiology < TROPICAL MEDICINE, Public health < INFECTIOUS DISEASES, PUBLIC HEALTH                                                                                                                                                                                                                                                                                                                                                                                                                                                                                                                                                                                                                                                                                                                                                                                                                                                                                                                                                                                                                                                                                                                                                                                                                               |
|                                 |                                                                                                                                                                                                                                                                                                                                                                                                                                                                                                                                                                                                                                                                                                                                                                                                                                                                                                                                                                                                                                                                                                                                                                                                                                                                                                                    |

1  
2  
3  
4  
5  
6  
7  
8  
9  
10  
11  
12  
13  
14  
15  
16  
17  
18  
19  
20  
21  
22  
23  
24  
25  
26  
27  
28  
29  
30  
31  
32  
33  
34  
35  
36  
37  
38  
39  
40  
41  
42  
43  
44  
45  
46  
47  
48  
49  
50  
51  
52  
53  
54  
55  
56  
57  
58  
59  
60

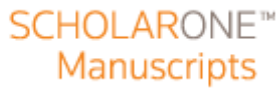





I, the Submitting Author has the right to grant and does grant on behalf of all authors of the Work (as defined in the below author licence), an exclusive licence and/or a non-exclusive licence for contributions from authors who are: i) UK Crown employees; ii) where BMJ has agreed a CC-BY licence shall apply, and/or iii) in accordance with the terms applicable for US Federal Government officers or employees acting as part of their official duties; on a worldwide, perpetual, irrevocable, royalty-free basis to BMJ Publishing Group Ltd ("BMJ") its licensees and where the relevant Journal is co-owned by BMJ to the co-owners of the Journal, to publish the Work in this journal and any other BMJ products and to exploit all rights, as set out in our [licence](#).

The Submitting Author accepts and understands that any supply made under these terms is made by BMJ to the Submitting Author unless you are acting as an employee on behalf of your employer or a postgraduate student of an affiliated institution which is paying any applicable article publishing charge ("APC") for Open Access articles. Where the Submitting Author wishes to make the Work available on an Open Access basis (and intends to pay the relevant APC), the terms of reuse of such Open Access shall be governed by a Creative Commons licence – details of these licences and which [Creative Commons](#) licence will apply to this Work are set out in our licence referred to above.

Other than as permitted in any relevant BMJ Author's Self Archiving Policies, I confirm this Work has not been accepted for publication elsewhere, is not being considered for publication elsewhere and does not duplicate material already published. I confirm all authors consent to publication of this Work and authorise the granting of this licence.

1

2  
3 1 **The impact and variability of social determinants of health on the transmission and outcomes**  
4 **of COVID-19 across the world: a systematic review protocol**  
5 2

6  
7 3  
8  
9 4

10 5 Minhazul Abedin<sup>a</sup>, Abrar Wahab<sup>a</sup>, Farah Naz Rahman<sup>a</sup>, Fardina Rahman Omi<sup>b</sup>, Saadia Shareen<sup>c</sup>,  
11 6 Shagoofa Rakhshanda<sup>a</sup>, Labida Islam<sup>a</sup>, Cinderella Akbar Mayaboti<sup>a</sup>, Uttam Kumar Saha<sup>a</sup>, Fazlay  
12 7 Faruque<sup>d</sup>, Lauren M. Fletcher<sup>e</sup>, Saidur Mashreky<sup>ab</sup>  
13  
14 8

15  
16  
17 9 <sup>a</sup>Department of Public Health Sciences, Centre for Injury Prevention and Research, Bangladesh,  
18 10 B-162, Road-23 New DOHS, Mohakhali, Dhaka-1206, Bangladesh

19 11  
20 12 <sup>b</sup>Bangladesh University of Health Sciences, 125/1 Darus Salam Rd, Dhaka 1216, Bangladesh  
21 13

22 14 <sup>c</sup>Department of Life Sciences, School of Environment and Life Sciences, Independent University,  
23 15 Bashundhara R/A, Dhaka-1229, Bangladesh  
24 16

25 17 <sup>d</sup>Department of Preventive Medicine, School of Population Health, University of Mississippi  
26 18 Medical Center, 2500 North State Street, Jackson, MS, 39216, USA  
27 19

28 20 <sup>e</sup>Rowland Medical Library, University of Mississippi Medical Center, 2500 North State Street,  
29 21 Jackson, MS, 39216, USA  
30 22

31  
32  
33  
34  
35  
36  
37  
38  
39  
40  
41  
42  
43  
44  
45  
46  
47  
48  
49  
50  
51

52 23  
53 24  
54 25 **\*Correspondence to**

55 26 Minhazul Abedin

56 27 Department of Public Health Sciences, Centre for Injury Prevention and Research, Bangladesh

57 28 Address: B-162, Road-23 New DOHS, Mohakhali, Dhaka-1206, Bangladesh

58 29 Email: [abedin@ciprb.org](mailto:abedin@ciprb.org)

59 30 Phone: +8801756503780  
60 31

61 32 **Word Count: ≈2250 Words**  
62 33  
63 34

2

**STRENGTHS AND LIMITATIONS OF THIS STUDY:**

- ◆ This review will address the impact of a wide range of social determinants of health (SODH) and the geographical variations that affect the transmission and outcomes of COVID-19.
- ◆ A multidisciplinary team is involved in this review and the search strategy was undertaken with the involvement of a library information scientist.
- ◆ A standard scientific reporting format will be used to summarize the review findings to avoid the shortcoming and biases of narrative synthesis.
- ◆ The influx of journal articles that were published over the last year in response to the current pandemic, without a scientific track record of previous studies, will be reviewed in this manuscript

3

**47 ABSTRACT****48 Introduction:**

49 The COVID-19 pandemic has exacerbated health inequalities across the globe, disproportionately  
50 affecting those with poor social determinants of health (SDOH). It is imperative to understand  
51 how SDOH influences the transmission and outcomes (positive case, hospitalization, and  
52 mortality) of COVID-19. This systematic review will investigate the impact of a wide range of  
53 SDOH across the globe on the transmission and outcomes of COVID-19.

**54 Methods and analysis:**

55 This review will follow the Preferred Reporting Items for Systematic Reviews and Meta-Analyses  
56 Protocol (PRISMA) guidelines. We searched articles published from January 1, 2019, to December  
57 31, 2021, in three electronic bibliographic databases (MEDLINE via PubMed, Embase, and  
58 Scopus), as well as the WHO COVID-19 Global Research on coronavirus disease database. We will  
59 consider observational studies that report statistical relationships between the social  
60 determinants of health (as listed in PROGRESS-Plus and Healthy People 2020) and COVID-19  
61 transmission and outcomes. There will be no limitation on the geographical location of  
62 publications. The quality of included observational studies will be assessed using a modified  
63 version of the Newcastle Ottawa Scale (NOS). A narrative Synthesis without Meta-Analysis  
64 (SWiM) reporting standards will be used to report the review findings.

**65 Ethics and dissemination:**

66 This review will be based on published studies obtained from publicly available sources, and  
67 therefore, ethical approval is not required. We will publish the results of this review in a peer-  
68 reviewed journal, as well as present the study findings at a national conference.

69

**70 PROSPERO registration number: CRD42021228818****71 Keywords:**

72 Social determinants of health, COVID-19, transmission, outcomes, geographical variations

73

74

75

4

## 76 INTRODUCTION

77  
78 In December 2019, a pneumonia case associated with SARS-CoV-2 was first identified in Wuhan,  
79 Hubei province, China. As of 24 April 2021, this emerging infection has caused 154,640,649  
80 infections and 3,232,285 deaths globally.[1] The current experience of the COVID-19 pandemic  
81 has taken the world by surprise, despite the modern advances in health sciences. Outcomes of  
82 the disease include not only an increased death toll but have put a spotlight on health  
83 inequalities.[2] According to the World Health Organization (WHO), social determinants of health  
84 (SDOH) are the non-medical factors that influence the health outcome of humans. They broadly  
85 define it by the conditions in which people are born, grow, work, live, and age and the wider set  
86 of forces and systems shaping the conditions of daily life.[3] All these conditions have a major  
87 impact on the health, wellbeing, and quality of life of an individual.[4] The transmission of any  
88 communicable disease is highly dependent on these SDOH. The vast dynamics of disease  
89 transmission may result in symptomatic or asymptomatic disease outcomes, which may lead to  
90 hospitalization and/or death. Generally, people residing in socioeconomically underdeveloped  
91 areas are at least three times more likely to die of preventable diseases compared to those in  
92 developed areas.[5] The socioeconomically disadvantaged population also has limited access to  
93 healthcare services. Studies show that even those who live above the poverty line are more prone  
94 to be affected by chronic health conditions.[6]

95  
96 This pandemic has made it clear that social determinants of health differentially affect disease  
97 transmission and outcomes globally.[2] Reports and studies generated from countries with high  
98 infection rates suggest that geographic variations were signifying higher transmission rates,  
99 hospitalizations, and mortality in marginalized, densely populated, low-income, and crowded  
100 households.[7–12]. Populations living in crowded neighborhoods are at a higher risk of becoming  
101 ill and transmitting the virus at an increased rate, as social distancing may not be feasible.[13–  
102 15]

103

5

1  
2  
3 104 Access to health care services is described by the National Academies of Sciences, Engineering,  
4 105 and Medicine as the “timely use of personal health services to achieve the best possible health  
5 106 outcomes”. [16] Access to healthcare is an influential SDOH that has gained attention during this  
6 107 COVID-19 pandemic. [17, 18] Accessibility to health care services may include geographic  
7 108 accessibility (within physical reach), economic accessibility (within financial reach), and cultural  
8 109 accessibility (acceptance and communication). [19–21] Health insurance is an important aspect  
9 110 of accessibility which is evident from several studies and reports. It has been demonstrated that  
10 111 there is unequal coverage of health insurance and access to services, leading to poorer health  
11 112 outcomes in marginalized groups. [22, 23] In a study by Gallup and West Health, it was found  
12 113 that 14% of adults in the U.S. do not seek healthcare when experiencing fever and dry cough due  
13 114 to the high cost of healthcare. [24] Given the fact that fever and dry cough are the most common  
14 115 symptoms of COVID-19, there is a high chance that many COVID-19 cases may go unnoticed or  
15 116 undiagnosed, which may result in unknowingly transmitting the disease. [25] Primary care visits  
16 117 may not be feasible, or people may hesitate to use health care resources without health  
17 118 insurance. This inability puts those without health insurance at risk of not being screened for  
18 119 chronic conditions, such as CVD (cardiovascular disease), hypertension, asthma, and diabetes.  
19 120 Therefore during this health emergency, access to health care may play a major role in whether  
20 121 an individual will test for COVID-19 and follow recommendations, such as social distancing and  
21 122 other preventive measures. [26]

22  
23  
24  
25  
26  
27  
28  
29  
30  
31  
32  
33  
34  
35  
36  
37  
38  
39  
40 124 In terms of racial disparities, the United States has experienced disproportionate outcomes of  
41 125 infection, hospitalization, and mortality among historically marginalized groups, such as African  
42 126 American, Hispanic and Asian populations. [27, 28] studies show that mortality due to COVID-19  
43 127 is associated with socioeconomic class. [29–31] Black, Asian, and minority ethnic (BAME)  
44 128 backgrounds represented one-third of the ICU admission in UK hospitals, while Somali  
45 129 immigrants living in Norway had a ten times higher rate of infection compared to the non-  
46 130 immigrants. [32, 33] Those who are minorities may not be aware of their underlying conditions  
47 131 due to barriers in accessing primary care and might be at high risk of developing more severe  
48 132 symptoms during this pandemic situation. [34, 35]

6

1  
2  
3 133  
4  
5 134 It is imperative to focus on SDOH during the COVID-19 pandemic to better understand  
6  
7 135 preventable health inequalities and to improve health outcomes. As such, there is an immediate  
8  
9 136 need to comprehend the social determinants of COVID-19 transmission and outcomes to  
10  
11 137 decrease human suffering and save lives.[36] In addition to known clinical risk factors, knowledge  
12  
13 138 of social risk factors will help policymakers and healthcare decision-makers to prioritize groups  
14  
15 139 who are most at-risk during the COVID-19 pandemic and formulate health messages accordingly.

140

### 141 **Objectives**

- 142 1. To find the impact of social determinants of health (SDOH) on the transmission and outcomes  
143 of COVID-19.
- 144 2. To explore the geographic variations of SDOH on transmission and outcomes of COVID-19.

145

### 146 **METHODS**

147 This protocol is registered with the International Prospective Register of Systematic Reviews  
148 (PROSPERO) under the registration number CRD42021228818 and follows the Preferred  
149 Reporting Items for Systematic Reviews and Meta-Analysis (PRISMA) guidelines,[37] as shown in  
150 **Figure 1**. The planned start dates of this review is 24 September 2020 and the anticipated end  
151 date will be 30 April 2022.

152

7

1  
2  
3  
4  
5  
6  
7  
8  
9  
10  
11  
12  
13  
14  
15  
16  
17  
18  
19  
20  
21  
22  
23  
24  
25  
26  
27  
28  
29  
30  
31  
32  
33  
34  
35  
36  
37  
38  
39  
40  
41  
42  
43  
44  
45  
46  
47  
48  
49  
50  
51  
52  
53  
54  
55  
56  
57  
58  
59  
60

153  
154  
155

**Figure 1: PRISMA 2009 Flow Diagram**

For peer review only



8

156

**Eligibility criteria**

A summary of eligibility criteria is shown in **Table 1**.

159

## Types of studies:

The types of studies that will be considered in this systematic review will include empirical quantitative studies following prospective and retrospective cohort, case-control, cross-sectional, pre-post designs, and modeling studies that report statistical relationships between exposures of interest (i.e., social determinants of health) and COVID-19 transmission and outcomes. The review will address the potential interaction effect or intersectional approach only if the analysis reports such findings, which is generally found in predictive modeling. Any hypothetical interaction or intersectional findings will be excluded from this review. This review will include studies with both self-reported and directly tested measures. We will only include studies published in the English language. Qualitative studies, reviews, narrative reviews, systematic reviews, meta-analyses, pharmacological and biochemical studies, animal model studies, conference abstracts, conference proceedings, and theses/dissertations will not be included in this systematic review. Simulation modeling, which does not report new empirical data, opinion literature, including commentaries, editorials, and analyses that discuss COVID-19 regarding equity, social determinants, and/or vulnerable populations, will also be excluded from the review.

176

## Types of study population:

Studies in this review will include populations of all ages, ethnicity, gender, and geographic location. We will consider any population that has been tested for COVID-19.

180

## Types of outcome measures:

Studies will be included if they use a measure for SDOH that could be hypothesized to affect the transmission and outcomes (confirmed positive case, hospitalization, and mortality) of COVID-19. We will use Healthy People 2020 and PROGRESS-Plus to classify our definition of social

9

185 determinants of health.[38, 39] Healthy People 2020 addresses five SDOH; economic stability,  
 186 education, social and community context, health and health care, neighborhood, and built  
 187 environment. PROGRESS-Plus refers to the place of residence, race/ethnicity/culture/language,  
 188 occupation, gender, religion, education, socioeconomic status, and social capital. Plus refers to  
 189 personal characteristics associated with discrimination (e.g., age, disability), features of  
 190 relationships (e.g., smoking parents, excluded from school), and time-dependent relationships  
 191 (e.g., leaving the hospital, respite care, other instances where a person may be temporarily at a  
 192 disadvantage).

193 **Table 1: Inclusion and exclusion criteria for the review**

| Inclusion criteria                                                                                                                                                                                                                                                                                                                                                                                                                                                                                                                                                                                                                                      | Exclusion criteria                                                                                                                                                                                                                                                                                                                                                                                                                                                                                                                                                                                                                                                     |
|---------------------------------------------------------------------------------------------------------------------------------------------------------------------------------------------------------------------------------------------------------------------------------------------------------------------------------------------------------------------------------------------------------------------------------------------------------------------------------------------------------------------------------------------------------------------------------------------------------------------------------------------------------|------------------------------------------------------------------------------------------------------------------------------------------------------------------------------------------------------------------------------------------------------------------------------------------------------------------------------------------------------------------------------------------------------------------------------------------------------------------------------------------------------------------------------------------------------------------------------------------------------------------------------------------------------------------------|
| <ul style="list-style-type: none"> <li>▪ Empirical-based observational quantitative studies such as cross-sectional, case-control, prospective and retrospective cohort, pre-post designs, and modeling studies</li> <li>▪ Studies covering any geographical locations</li> <li>▪ Studies in the English language only</li> <li>▪ Studies covering people of all age groups</li> <li>▪ Studies that include SDOH listed in PROGRESS-Plus &amp; Healthy People 2020</li> <li>▪ Studies that include any COVID-19 positive population</li> <li>▪ Studies that include populations tested positive for COVID-19, with underlying co-morbidities</li> </ul> | <ul style="list-style-type: none"> <li>▪ Studies in Non-English language</li> <li>▪ Qualitative studies, simulation modeling studies (without new empirical data), review studies, systematic review, review of the systematic review, meta-analysis, narrative reviews, conference abstracts, proceedings, thesis</li> <li>▪ Pharmacological and biochemical studies, animal model studies,</li> <li>▪ Opinion literature, including commentaries, editorials, brief reports, perspectives, and analyses</li> <li>▪ Studies that include COVID-19 disease outcomes among special populations (such as patients with HIV, prisoners, cancer patients, etc.)</li> </ul> |

10

|                                                                                                            |                                                                 |
|------------------------------------------------------------------------------------------------------------|-----------------------------------------------------------------|
| ▪ Studies that include a population that required hospitalization or resulted in mortality due to COVID-19 | ▪ Articles with missing descriptions of findings and/or results |
|------------------------------------------------------------------------------------------------------------|-----------------------------------------------------------------|

194

### 195 **Search strategy**

196 We have developed a comprehensive literature search to locate both published and non-  
197 traditionally literature. We will search for articles published from January 1, 2019, to December  
198 31, 2021, in three electronic bibliographic databases (PubMed, Embase, and Scopus), as well as  
199 the WHO Global Research on Coronavirus Disease database, to ensure results focused on the  
200 novel COVID-19 pandemic and retrieve pre-print articles and non-traditionally published  
201 literature. Our COVID\_19 search strategy was developed using the published Ovid Embase  
202 COVID-19 search strategy translated for use in the searched databases.[40] The full, detailed  
203 search strategy is available in **Supplement 1**. Following the search, all identified citations will be  
204 imported into EndNote X9 (Clarivate Analytics, PA, USA), and duplicates removed. Deduplicated  
205 results will be exported to an Excel spreadsheet for screening. The reference lists of all included  
206 studies will then be reviewed for eligible studies.

207

### 208 **Study records**

209 Selection process:

210 Based on the title and abstract (where available), ten (10) researchers will initially review and  
211 assess potential articles for eligibility that meet inclusion criteria, while maintaining a low  
212 threshold for consideration for further review. The same researchers will screen the full text of  
213 the potential articles for inclusion. We will resolve disagreement or uncertainty regarding the  
214 eligibility of particular studies through discussion by two independent researchers.

215

### 216 **Data management and collection:**

217 Ten (10) researchers will work on data extraction using a piloted data extraction tool, and the  
218 extracted data will be reviewed by a supervisor for errors.

219 Data to be collected:

220

221

222

223

224

225

11

- 1  
2  
3 220 a. Study details (title, year of publication, author, abstract, study design, country, region)  
4  
5 221 b. Study population characteristics (age, sex...)  
6  
7 222 c. Sampling strategy and sample size  
8  
9 223 d. SODH including participant demographics (place of residence, occupation,  
10  
11 224 race/ethnicity/culture/language, education, religion, social capital, socioeconomic status,  
12  
13 225 economic stability, education, social and community contexts, health and health care access,  
14  
15 226 neighborhood and built environment).[38, 39]  
16 227 e. Outcome severity of COVID-19  
17  
18 228

## 20 229 **OUTCOMES**

21 230 This systematic review will focus on SDOH that impacts the transmission and outcomes of COVID-  
22  
23 231 19. We will also look for the geographical variations of these outcomes from the selected articles  
24  
25 232 for this review. The following outcomes will be examined:

- 26  
27 233 a. Positive COVID-19 cases  
28  
29 234 b. Hospitalization due to COVID-19 that includes regular bed patients admission, High  
30  
31 235 Dependency Unit (HDU) patient admission, Intensive Care Unit (ICU) patient admission  
32  
33 236 c. Mortality due to COVID-19  
34  
35 237

## 36 238 **RISK OF BIAS**

37  
38 239 To assess the quality of included observational studies, we will use a modified version of the  
39  
40 240 Newcastle Ottawa Scale.[41] Two reviewers will independently assess each study, with  
41  
42 241 discrepancies resolved by agreement or a third independent assessor if such agreement cannot  
43  
44 242 be achieved.  
45  
46 243

## 47 244 **DATA SYNTHESIS & ANALYSIS**

48  
49 245 This review is broad and exploratory in nature, and therefore, a meta-analysis of the effect  
50  
51 246 estimate is not planned, but data will be evaluated for the possibility of conducting a meta-  
52  
53 247 analysis. To avoid the shortcomings in the reporting of narrative synthesis, we will follow the  
54  
55 248 Synthesis without Meta-Analysis (SWiM) reporting standards.[42] We will tabulate the results  
56  
57  
58  
59  
60

12

1  
2  
3 249 and narrate the summary of findings for each SDOH identified in this review. Additionally, we will  
4  
5 250 prepare at least three tables consisting of the study characteristics, participant characteristics,  
6  
7 251 and a summary of findings that describes study setting, size, methodology, primary outcomes,  
8  
9 252 secondary outcomes, summary statistics, and/or statistical results (risk ratios, odds ratios, risk  
10  
11 253 differences, mean differences, standardized mean differences, the ratio of means), and  
12  
13 254 relationship to SDOH.  
14  
15 255

## 16 256 **DISCUSSION**

17  
18 257 Our systematic review will focus on the role that social determinants of health play in the  
19  
20 258 transmission and outcomes of COVID-19. We hope that the concluded review will provide  
21  
22 259 evidence to determine the impact and variability of social determinants of health associated with  
23  
24 260 SARS-CoV-2 infection and the dynamics of transmission and outcomes. This protocol will guide  
25  
26 261 the review homogeneously and methodologically. Our systematic review will address a gap in  
27  
28 262 the COVID-19 literature, by exploring not only the impact social determinants of health have on  
29  
30 263 the transmission and outcomes of the disease but also by exploring the global geographical  
31  
32 264 differences of SDOH and its impact on the COVID-19 pandemic. Through this review, we hope to  
33  
34 265 provide an empirical understanding of the diverse social determinants of COVID-19, which could  
35  
36 266 appraise the global pandemic response efforts as well as provide comprehensive evidence for  
37  
38 267 future public health policy implications.  
39

## 40 269 **PATIENT/PUBLIC INVOLVEMENT**

41  
42 270 There will be no patient or public involvement in this study.  
43  
44 271

## 45 272 **ETHICS AND DISSEMINATION**

46  
47 273 As the data included in this review have been published or obtained from publicly available  
48  
49 274 sources, ethical approval is not required. We will submit the full systematic review manuscript to  
50  
51 275 a peer-reviewed journal and will present the study results at a national conference.  
52  
53 276

## 54 277 **AUTHOR CONTRIBUTIONS**

13

1  
2  
3 278 All authors have contributed equally to the design and conceptualization of this review. MA, AW,  
4  
5 279 FNR, FRO, SS, SR, CAM, and LI drafted the manuscript and protocol with UKS, FF, SRM, and LF as  
6  
7 280 editors. LF developed the search strategy with input from UKS, FF, and SRM concerning keywords  
8  
9 281 and databases. All review methods were planned and discussed with the authors, with LF acting  
10  
11 282 as a methodological mentor.

12 283

**284 FUNDING**

15  
16 285 All authors declare that they have not received any grant/fund for this research from any source.

17 286

**287 COMPETING INTERESTS**

18  
19  
20  
21 288 Authors declare that they have no competing interests.

22 289

**290 PATIENT CONSENT FOR PUBLICATION**

23  
24  
25  
26  
27 291 Not

required

## 292 REFERENCES

- 293 1 WHO Coronavirus (COVID-19) Dashboard | WHO Coronavirus (COVID-19) Dashboard  
294 With Vaccination Data. <https://covid19.who.int/> (accessed 6 May 2021).
- 295 2 Abrams EM, Szeffler SJ. COVID-19 and the impact of social determinants of health. *Lancet*  
296 *Respir. Med.* 2020;8:659–61. doi:10.1016/S2213-2600(20)30234-4
- 297 3 WHO | Social determinants of health.
- 298 4 Marmot M, Allen JJ. Social determinants of health equity. *Am. J. Public Health.* 2014;104.  
299 doi:10.2105/AJPH.2014.302200
- 300 5 Preventable deaths and deprivation | The Health Foundation.  
301 [https://www.health.org.uk/news-and-comment/charts-and-infographics/preventable-](https://www.health.org.uk/news-and-comment/charts-and-infographics/preventable-death-and-deprivation)  
302 [death-and-deprivation](https://www.health.org.uk/news-and-comment/charts-and-infographics/preventable-death-and-deprivation) (accessed 14 Apr 2021).
- 303 6 WHO | Part Two. The urgent need for action. *WHO* Published Online First:  
304 2015.[http://www.who.int/chp/chronic\\_disease\\_report/part2\\_ch2/en/](http://www.who.int/chp/chronic_disease_report/part2_ch2/en/) (accessed 15 Apr  
305 2021).
- 306 7 Deaths involving COVID-19 by local area and socioeconomic deprivation - Office for  
307 National Statistics.  
308 [https://www.ons.gov.uk/peoplepopulationandcommunity/birthsdeathsandmarriages/de-](https://www.ons.gov.uk/peoplepopulationandcommunity/birthsdeathsandmarriages/deaths/bulletins/deathsinvolvingcovid19bylocalareasanddeprivation/deathsoccurringbetween1marchand17april)  
309 [aths/bulletins/deathsinvolvingcovid19bylocalareasanddeprivation/deathsoccurringbetw-](https://www.ons.gov.uk/peoplepopulationandcommunity/birthsdeathsandmarriages/deaths/bulletins/deathsinvolvingcovid19bylocalareasanddeprivation/deathsoccurringbetween1marchand17april)  
310 [een1marchand17april](https://www.ons.gov.uk/peoplepopulationandcommunity/birthsdeathsandmarriages/deaths/bulletins/deathsinvolvingcovid19bylocalareasanddeprivation/deathsoccurringbetween1marchand17april) (accessed 25 Apr 2021).
- 311 8 Adhikari S, Pantaleo NP, Feldman JM, *et al.* Assessment of Community-Level Disparities in  
312 Coronavirus Disease 2019 (COVID-19) Infections and Deaths in Large US Metropolitan  
313 Areas. *JAMA Netw open* 2020;3:e2016938. doi:10.1001/jamanetworkopen.2020.16938
- 314 9 Lower income people, new immigrants at higher COVID-19 risk in Toronto, data suggests  
315 | CBC News. [https://www.cbc.ca/news/canada/toronto/low-income-immigrants-covid-](https://www.cbc.ca/news/canada/toronto/low-income-immigrants-covid-19-infection-1.5566384)  
316 [19-infection-1.5566384](https://www.cbc.ca/news/canada/toronto/low-income-immigrants-covid-19-infection-1.5566384) (accessed 25 Apr 2021).
- 317 10 Millett GA, Jones AT, Benkeser D, *et al.* Assessing differential impacts of COVID-19 on  
318 black communities. *Ann Epidemiol* 2020;47:37–44.  
319 doi:10.1016/j.annepidem.2020.05.003
- 320 11 Baqui P, Bica I, Marra V, *et al.* Ethnic and regional variations in hospital mortality from

15

- 1  
2  
3 321 COVID-19 in Brazil: a cross-sectional observational study. *Lancet Glob Heal*  
4 322 2020;8:e1018–26. doi:10.1016/S2214-109X(20)30285-0  
5  
6  
7 323 12 Martins-Filho PR, Araújo BCL, Sposato KB, *et al.* Racial disparities in covid-19-related  
8 324 deaths in brazil: Black lives matter? *J. Epidemiol.* 2021;31:239–40.  
9 325 doi:10.2188/jea.JE20200589  
10  
11  
12 326 13 Wong DWS, Li Y. Spreading of COVID-19: Density matters. *PLoS One* 2020;15:e0242398.  
13 327 doi:10.1371/journal.pone.0242398  
14  
15  
16 328 14 Coronavirus: In dense Bangladesh, social distancing a tough task | Coronavirus pandemic  
17 329 News | Al Jazeera. [https://www.aljazeera.com/news/2020/3/20/coronavirus-in-dense-](https://www.aljazeera.com/news/2020/3/20/coronavirus-in-dense-bangladesh-social-distancing-a-tough-task)  
18 330 [bangladesh-social-distancing-a-tough-task](https://www.aljazeera.com/news/2020/3/20/coronavirus-in-dense-bangladesh-social-distancing-a-tough-task) (accessed 25 Apr 2021).  
19  
20  
21 331 15 For India’s slum dwellers, social distancing will be impossible during Covid-19 lockdown -  
22 332 CNN. [https://edition.cnn.com/2020/03/30/india/india-coronavirus-social-distancing-intl-](https://edition.cnn.com/2020/03/30/india/india-coronavirus-social-distancing-intl-hnk/index.html)  
23 333 [hnk/index.html](https://edition.cnn.com/2020/03/30/india/india-coronavirus-social-distancing-intl-hnk/index.html) (accessed 25 Apr 2021).  
24  
25  
26  
27 334 16 Kawachi I, Berkman LF. Social Capital, Social Cohesion, and Health. In: *Social*  
28 335 *Epidemiology*. Oxford University Press 2015. 290–319.  
29 336 doi:10.1093/med/9780195377903.003.0008  
30  
31  
32 337 17 Ahmed SAKS, Ajisola M, Azeem K, *et al.* Impact of the societal response to COVID-19 on  
33 338 access to healthcare for non-COVID-19 health issues in slum communities of Bangladesh,  
34 339 Kenya, Nigeria and Pakistan: results of pre-COVID and COVID-19 lockdown stakeholder  
35 340 engagements. *BMJ Glob Heal* 2020;5:e003042. doi:10.1136/bmjgh-2020-003042  
36  
37  
38 341 18 Shadmi E, Chen Y, Dourado I, *et al.* Health equity and COVID-19: Global perspectives. *Int.*  
39 342 *J. Equity Health.* 2020;19:104. doi:10.1186/s12939-020-01218-z  
40  
41  
42 343 19 Oliver A, Mossialos E. Equity of access to health care: Outlining the foundations for  
43 344 action. *J. Epidemiol. Community Health.* 2004;58:655–8. doi:10.1136/jech.2003.017731  
44  
45  
46 345 20 Bhatt J, Bathija P. Ensuring Access to Quality Health Care in Vulnerable Communities.  
47 346 *Acad Med* 2018;93:1271–5. doi:10.1097/ACM.0000000000002254  
48  
49  
50 347 21 Access to Health Services | Healthy People 2020.  
51 348 [https://www.healthypeople.gov/2020/topics-objectives/topic/social-determinants-](https://www.healthypeople.gov/2020/topics-objectives/topic/social-determinants-health/interventions-resources/access-to-health)  
52 349 [health/interventions-resources/access-to-health](https://www.healthypeople.gov/2020/topics-objectives/topic/social-determinants-health/interventions-resources/access-to-health) (accessed 15 Apr 2021).  
53  
54  
55  
56  
57  
58  
59  
60



- 1  
2  
3 350 22 Health Disparities by Race and Ethnicity - Center for American Progress.  
4  
5 351 [https://www.americanprogress.org/issues/race/reports/2020/05/07/484742/health-](https://www.americanprogress.org/issues/race/reports/2020/05/07/484742/health-disparities-race-ethnicity/)  
6  
7 352 [disparities-race-ethnicity/](https://www.americanprogress.org/issues/race/reports/2020/05/07/484742/health-disparities-race-ethnicity/) (accessed 23 Apr 2021).  
8  
9 353 23 Buchmueller TC, Levinson ZM, Levy HG, *et al.* Effect of the affordable care act on racial  
10 and ethnic disparities in health insurance coverage. *Am J Public Health* 2016;106:1416–  
11 354 21. doi:10.2105/AJPH.2016.303155  
12 355  
13  
14 356 24 In U.S., 14% With Likely COVID-19 to Avoid Care Due to Cost.  
15  
16 357 <https://news.gallup.com/poll/309224/avoid-care-likely-covid-due-cost.aspx> (accessed 23  
17  
18 358 Apr 2021).  
19  
20 359 25 Transmission of SARS-CoV-2: implications for infection prevention precautions.  
21  
22 360 [https://www.who.int/news-room/commentaries/detail/transmission-of-sars-cov-2-](https://www.who.int/news-room/commentaries/detail/transmission-of-sars-cov-2-implications-for-infection-prevention-precautions)  
23 361 [implications-for-infection-prevention-precautions](https://www.who.int/news-room/commentaries/detail/transmission-of-sars-cov-2-implications-for-infection-prevention-precautions) (accessed 23 Apr 2021).  
24  
25 362 26 Sohn H. Racial and Ethnic Disparities in Health Insurance Coverage: Dynamics of Gaining  
26 and Losing Coverage Over the Life-Course. *Popul Res Policy Rev* 2017;36:181–201.  
27 363 doi:10.1007/s11113-016-9416-y  
28 364  
29 365 27 COVID-19 Racial Disparities in Testing, Infection, Hospitalization, and Death: Analysis of  
30 Epic Patient Data | KFF. [https://www.kff.org/coronavirus-covid-19/issue-brief/covid-19-](https://www.kff.org/coronavirus-covid-19/issue-brief/covid-19-racial-disparities-testing-infection-hospitalization-death-analysis-epic-patient-data/)  
31 366 [racial-disparities-testing-infection-hospitalization-death-analysis-epic-patient-data/](https://www.kff.org/coronavirus-covid-19/issue-brief/covid-19-racial-disparities-testing-infection-hospitalization-death-analysis-epic-patient-data/)  
32 367 (accessed 25 Apr 2021).  
33 368  
34  
35 369 28 Risk for COVID-19 Infection, Hospitalization, and Death By Race/Ethnicity | CDC.  
36  
37 370 [https://www.cdc.gov/coronavirus/2019-ncov/covid-data/investigations-](https://www.cdc.gov/coronavirus/2019-ncov/covid-data/investigations-discovery/hospitalization-death-by-race-ethnicity.html)  
38 371 [discovery/hospitalization-death-by-race-ethnicity.html](https://www.cdc.gov/coronavirus/2019-ncov/covid-data/investigations-discovery/hospitalization-death-by-race-ethnicity.html) (accessed 25 Apr 2021).  
39 372  
40 373 29 Shahbazi F, Khazaei S. Socio-economic inequality in global incidence and mortality rates  
41 from coronavirus disease 2019: an ecological study. *New Microbes New Infect*  
42 374 2020;38:100762. doi:10.1016/j.nmni.2020.100762  
43 375  
44 376 30 Seligman B, Ferranna M, Bloom DE. Social determinants of mortality from COVID-19: A  
45 simulation study using NHANES. *PLOS Med* 2021;18:e1003490.  
46 377 doi:10.1371/journal.pmed.1003490  
47 378  
48 379 31 Karmakar M, Lantz PM, Tipirneni R. Association of Social and Demographic Factors with  
49  
50  
51  
52  
53  
54  
55  
56  
57  
58  
59  
60

17

- 1  
2  
3 379 COVID-19 Incidence and Death Rates in the US. *JAMA Netw Open* 2021;4:e2036462–  
4 e2036462. doi:10.1001/jamanetworkopen.2020.36462  
5 380  
6  
7 381 32 Baumer T, Phillips E, Dhadda A, *et al.* Epidemiology of the First Wave of COVID-19 ICU  
8 Admissions in South Wales—The Interplay Between Ethnicity and Deprivation. *Front Med*  
9 382 2020;7:569714. doi:10.3389/fmed.2020.569714  
10 383  
11  
12 384 33 Indseth T, Grøslund M, Arnesen T, *et al.* COVID-19 among immigrants in Norway, notified  
13 infections, related hospitalizations and associated mortality: A register-based study.  
14 385 *Scand J Public Health* 2021;49:48–56. doi:10.1177/1403494820984026  
15 386  
16  
17 387 34 Germain S, Yong A. COVID-19 Highlighting Inequalities in Access to Healthcare in England:  
18 A Case Study of Ethnic Minority and Migrant Women. *Fem. Leg. Stud.* 2020;28:301–10.  
19 388 doi:10.1007/s10691-020-09437-z  
20 389  
21  
22 390 35 Szczepura A. Access to health care for ethnic minority populations. *Postgrad. Med. J.*  
23 2005;81:141–7. doi:10.1136/pgmj.2004.026237  
24 391  
25  
26 392 36 Paremoer L, Nandi S, Serag H, *et al.* Covid-19 pandemic and the social determinants of  
27 health. *BMJ.* 2021;372. doi:10.1136/bmj.n129  
28 393  
29  
30 394 37 Page MJ, McKenzie JE, Bossuyt PM, *et al.* The PRISMA 2020 statement: an updated  
31 guideline for reporting systematic reviews. *BMJ* 2021;;n71. doi:10.1136/bmj.n71  
32 395  
33  
34 396 38 Social Determinants of Health | Healthy People 2020.  
35 [https://www.healthypeople.gov/2020/topics-objectives/topic/social-determinants-of-](https://www.healthypeople.gov/2020/topics-objectives/topic/social-determinants-of-health)  
36 397 [health](https://www.healthypeople.gov/2020/topics-objectives/topic/social-determinants-of-health) (accessed 15 Apr 2021).  
37 398  
38  
39 399 39 PROGRESS-Plus | Cochrane Equity.  
40 <https://methods.cochrane.org/equity/projects/evidence-equity/progress-plus> (accessed  
41 400 9 May 2021).  
42 401  
43  
44 402 40 Ovid Database Guide. <https://ospguides.ovid.com/OSPguides/medline.htm> (accessed 15  
45 403 Apr 2021).  
46 404  
47  
48 404 41 Ottawa Hospital Research Institute.  
49 [http://www.ohri.ca/programs/clinical\\_epidemiology/oxford.asp](http://www.ohri.ca/programs/clinical_epidemiology/oxford.asp) (accessed 3 Apr 2021).  
50 405  
51  
52 406 42 Campbell M, McKenzie JE, Sowden A, *et al.* Synthesis without meta-analysis (SWiM) in  
53 407 systematic reviews: Reporting guideline. *BMJ* 2020;368. doi:10.1136/bmj.l6890

18

408

For peer review only

1  
2  
3  
4  
5  
6  
7  
8  
9  
10  
11  
12  
13  
14  
15  
16  
17  
18  
19  
20  
21  
22  
23  
24  
25  
26  
27  
28  
29  
30  
31  
32  
33  
34  
35  
36  
37  
38  
39  
40  
41  
42  
43  
44  
45  
46  
47  
48  
49  
50  
51  
52  
53  
54  
55  
56  
57  
58  
59  
60

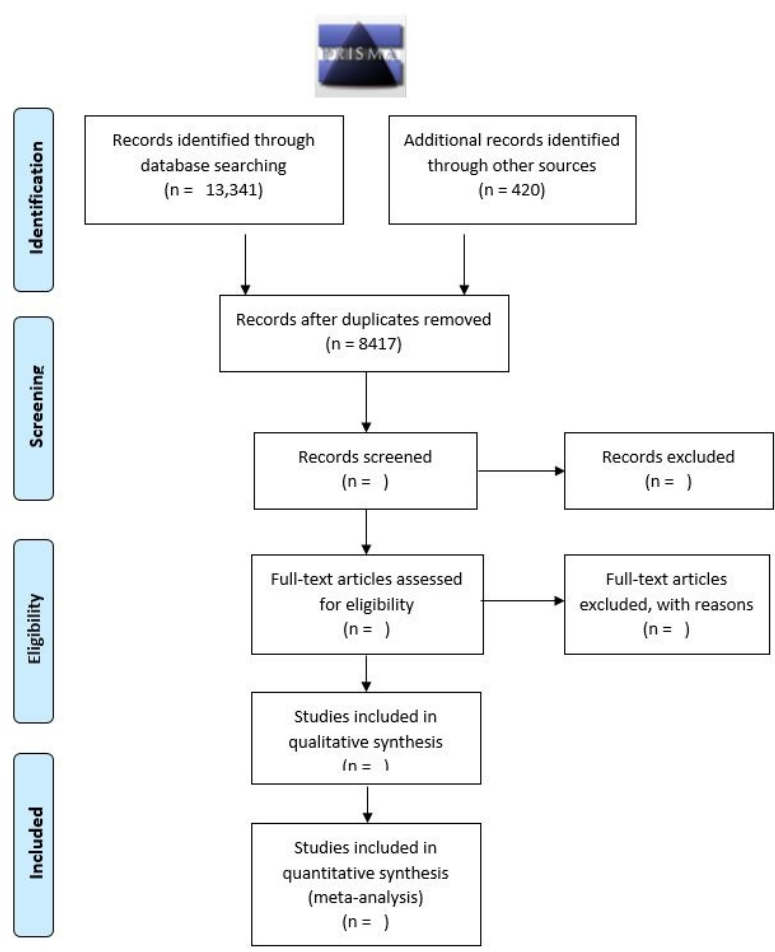

Figure 1: PRISMA 2009 Flow Diagram

Figure 1: PRISMA 2009 Flow Diagram

166x170mm (120 x 120 DPI)

1

2  
3  
4  
5  
6  
7  
8  
9  
10  
11  
12  
13  
14  
15  
16  
17  
18  
19  
20  
21  
22  
23  
24  
25  
26  
27  
28  
29  
30  
31  
32  
33  
34  
35  
36  
37  
38  
39  
40  
41  
42  
43  
44  
45  
46  
47  
48  
49  
50  
51  
52  
53  
54  
55  
56  
57  
58  
59  
60SUPPLEMENT 1:  
Embase

|    |                                                                                                                                                                                                                                                                                                               |
|----|---------------------------------------------------------------------------------------------------------------------------------------------------------------------------------------------------------------------------------------------------------------------------------------------------------------|
| 13 | 'health care access'/de                                                                                                                                                                                                                                                                                       |
| 14 | ((acces* OR avail*) NEXT/2 (healthcare OR 'health care' OR 'health service*')):ti,ab,kw                                                                                                                                                                                                                       |
| 15 | 'socioeconomics'/exp                                                                                                                                                                                                                                                                                          |
| 16 | ('socioeconomic factors' OR 'health services accessibility'):ti,ab,kw,de                                                                                                                                                                                                                                      |
| 17 | (education* achieve* OR education* status):ti,ab,kw,de                                                                                                                                                                                                                                                        |
| 18 | 'health insurance'/de                                                                                                                                                                                                                                                                                         |
| 19 | 'unemployment'/de                                                                                                                                                                                                                                                                                             |
| 20 | 'social isolation'/exp                                                                                                                                                                                                                                                                                        |
| 21 | 'social determinant of health'/de                                                                                                                                                                                                                                                                             |
| 22 | 'social environment'/de                                                                                                                                                                                                                                                                                       |
| 23 | 'social exclusion'/de                                                                                                                                                                                                                                                                                         |
| 24 | ('health insurance' (standard* NEXT/1 living) OR 'social determinant*' OR unemployment OR 'social isolation' OR 'psychosocial deprivation' OR 'social environment' OR 'social exclusion' OR 'social marginali*ation'):ti,ab,kw                                                                                |
| 25 | ('social determinant? of health' OR SDOH OR SDH OR 'social deprivation' OR 'social disadvantage' OR 'financial difficult*' OR 'financial problem?' OR 'income difference*' OR indigent* OR 'insurance status' OR jobless OR 'job insecurity*' OR 'low income' OR marginali* OR 'occupation* status'):ti,ab,kw |
| 26 | (Poverty OR SES OR 'social disparit*' OR 'social environment' OR 'social exclusion' OR 'social factor?' OR 'social gradient?' OR 'social position?' OR 'social variation?' OR 'socioeconomic status' OR 'socioeconomic circumstances' OR 'socioeconomic gradient'):ti,ab,kw                                   |
| 27 | ('socioeconomic health differences' OR 'socioeconomic position' OR 'socioeconomic variable' OR underprivilege* OR unemployed OR unemployment OR uninsur* OR 'vulnerable population' OR 'vulnerable group?' OR 'vulnerable communit*' OR 'vulnerable people' OR 'vulnerable person?'):ti,ab,kw                 |
| 28 | ((socio* OR social*) NEXT/10 (predict* OR prognos* OR risk*)):ti,ab,kw                                                                                                                                                                                                                                        |

2

|    |                                                                                                              |
|----|--------------------------------------------------------------------------------------------------------------|
| 29 | #13 OR #14 OR #15 OR #16 OR #17 OR #18 OR #19 OR #20 OR #21 OR #22 OR #23 OR #24 OR #25 OR #26 OR #27 OR #28 |
| 30 | #12 AND #29                                                                                                  |

**PubMed**

|   |                                                                                                                                                                                                                                                                                                                                                                                                                                                                                                                                                 |
|---|-------------------------------------------------------------------------------------------------------------------------------------------------------------------------------------------------------------------------------------------------------------------------------------------------------------------------------------------------------------------------------------------------------------------------------------------------------------------------------------------------------------------------------------------------|
| 1 | "Coronavirus"[Mesh]                                                                                                                                                                                                                                                                                                                                                                                                                                                                                                                             |
| 2 | "Coronavirus Infections"[Mesh]                                                                                                                                                                                                                                                                                                                                                                                                                                                                                                                  |
| 3 | (coronavirus*[tw] OR corona virus*[tw] OR OC43[tw] OR NL63[tw] OR 22pE[tw] OR HKU1[tw] OR HCoV*[tw] OR ncov*[tw] OR covid*[tw] OR sars-cov*[tw] OR sarscov*[tw] OR Sars-coronavirus*[tw] OR Severe Acute Respiratory Syndrome Coronavirus*[tw])                                                                                                                                                                                                                                                                                                 |
| 4 | #1 OR #2 OR #3                                                                                                                                                                                                                                                                                                                                                                                                                                                                                                                                  |
| 5 | (MERS[tw] OR MERS-CoV[tw] OR Middle East respiratory syndrome[tw] OR camel*[tw] OR dromedary*[tw] OR equine[tw] OR coronary[tw] OR coronal[tw] OR covidence*[tw] OR covidien[tw] OR influenza virus[tw] OR HIV[tw] OR bovine[tw] OR calves[tw] OR TGEV[tw] OR feline[tw] OR porcine[tw] OR BCoV[tw] OR PEDV[tw] OR PDCoV[tw] OR FIPV[tw] OR FCoV[tw] OR SADS-CoV[tw] OR canine[tw] OR CCov[tw] OR zoonotic[tw] OR avian influenza[tw] OR H1N1[tw] OR H5N1[tw] OR H5N6[tw] OR IBV[tw] OR murine corona*[tw])                                     |
| 6 | #4 NOT #5                                                                                                                                                                                                                                                                                                                                                                                                                                                                                                                                       |
| 7 | ((((pneumonia[tw] OR covid*[tw] OR coronavirus*[tw] OR corona virus*[tw] OR ncov*[tw] OR 2019ncov[tw] OR sars*[tw]) OR "Pneumonia"[Mesh]) AND Wuhan[tw])                                                                                                                                                                                                                                                                                                                                                                                        |
| 8 | (coronavirus disease 2019[tw] OR 2019-ncov[tw] OR 2019nCoV[tw] OR ncov2019[tw] OR ncov19[tw] OR ncov-19[tw] OR HCoV-19[tw] OR 2019-novel CoV[tw] OR severe acute respiratory syndrome coronavirus 2[tw] OR sars2[tw] OR sars 2[tw] OR sars-cov2[tw] OR sars-cov-2[tw] OR sarscov2[tw] OR sarscov-2[tw] OR Sars-coronavirus2[tw] OR Sars-coronavirus-2[tw] OR SARS-CoV-19[tw] OR SARS-like coronavirus*[tw] OR coronavirus-19[tw] OR covid19[tw] OR covid-19[tw] OR covid 2019[tw] OR ((novel[tw] OR new[tw] OR nouveau[tw]) AND (CoV OR nCoV OR |

3

|    |                                                                                                                                                                                                                                                                                                                                                                                                         |
|----|---------------------------------------------------------------------------------------------------------------------------------------------------------------------------------------------------------------------------------------------------------------------------------------------------------------------------------------------------------------------------------------------------------|
|    | covid OR coronavirus*) OR ("corona virus" OR Pandemi*) OR coronavirus pandemic[tw] OR covid pandemic [tw] OR covid19 pandemic[tw] OR covid-19 pandemic[tw])                                                                                                                                                                                                                                             |
| 9  | "COVID-19" [Supplementary Concept]                                                                                                                                                                                                                                                                                                                                                                      |
| 10 | "severe acute respiratory syndrome coronavirus 2" [Supplementary Concept]                                                                                                                                                                                                                                                                                                                               |
| 11 | #7 OR #12 OR #9 OR #10                                                                                                                                                                                                                                                                                                                                                                                  |
| 12 | #6 OR #11                                                                                                                                                                                                                                                                                                                                                                                               |
| 13 | "Health Services Accessibility"[Mesh]                                                                                                                                                                                                                                                                                                                                                                   |
| 14 | (acces* healthcare[tw] OR acces* heath care[tw] OR acces* health service*[tw] OR avail* healthcare[tw] OR avail* health care[tw] OR avail* health service*[tw])                                                                                                                                                                                                                                         |
| 15 | "socioeconomic factors"[MeSH]                                                                                                                                                                                                                                                                                                                                                                           |
| 16 | (socioeconomic factors[tw] OR socioeconomic[tw] OR health services accessibility[tw])                                                                                                                                                                                                                                                                                                                   |
| 17 | (education* achieve*[tw] OR education* status[tw])                                                                                                                                                                                                                                                                                                                                                      |
| 18 | "Insurance, Health"[MeSH:NoExp]                                                                                                                                                                                                                                                                                                                                                                         |
| 19 | "Unemployment"[MeSH]                                                                                                                                                                                                                                                                                                                                                                                    |
| 20 | "Social Isolation"[Mesh]                                                                                                                                                                                                                                                                                                                                                                                |
| 21 | "Social Determinants of Health"[MeSH]                                                                                                                                                                                                                                                                                                                                                                   |
| 22 | "Social Environment"[Mesh:NoExp]                                                                                                                                                                                                                                                                                                                                                                        |
| 23 | "Social Marginalization"[Mesh]                                                                                                                                                                                                                                                                                                                                                                          |
| 24 | (health insurance[tw] OR "standard of living"[tw] OR social determinant*[tw] OR unemployment[tw] OR social isolation[tw] OR psychosocial deprivation[tw] OR social environment[tw] OR social exclusion[tw] OR social marginalization[tw] OR social marginalisation[tw])                                                                                                                                 |
| 25 | (social determinant of health[tw] OR social determinants of health[tw] OR SDOH[tw] OR SDH[tw] OR social deprivation[tw] OR social disadvantage[tw] OR financial difficult*[tw] OR financial problem[tw] OR financial problems[tw] OR income differences[tw] OR indigent[tw] OR insurance status[tw] OR jobless[tw] OR job insecurit*[tw] OR low income[tw] OR marginali*[tw] OR occupation* status[tw]) |

4

|    |                                                                                                                                                                                                                                                                                                                                                                                 |
|----|---------------------------------------------------------------------------------------------------------------------------------------------------------------------------------------------------------------------------------------------------------------------------------------------------------------------------------------------------------------------------------|
| 26 | (poverty[tw] OR SES[tw] OR social disparit*[tw] OR social factor[tw] OR social factors[tw] OR social gradient[tw] OR social gradients[tw] OR social position[tw] OR social positions[tw] OR social variation[tw] OR social variations[tw] OR socioeconomic status[tw] OR socioeconomic circumstance*[tw] OR socioeconomic gradient[tw])                                         |
| 27 | (socioeconomic health differences[tw] OR socioeconomic position[tw] OR socioeconomic variable[tw] OR underprivilege*[tw] OR unemployed[tw] OR uninsur*[tw] OR vulnerable population[tw] OR vulnerable populations[tw] OR vulnerable group[tw] OR vulnerable groups[tw] OR vulnerable communit*[tw] OR vulnerable people[tw] OR vulnerable person[tw] OR vulnerable persons[tw]) |
| 28 | (socio* predict*[tw] OR socio* prognos*[tw] OR socio* risk*[tw] OR social*predict*[tw] OR social* prognos*[tw] OR social* risk*[tw])                                                                                                                                                                                                                                            |
| 29 | #13 OR #14 OR #15 OR #16 OR #17 OR #18 OR #19 OR #20 OR #21 OR #22 OR #23 OR #24 OR #25 OR #26 OR #27 OR #28                                                                                                                                                                                                                                                                    |
| 30 | #12 AND #29                                                                                                                                                                                                                                                                                                                                                                     |

### Scopus

|   |                                                                                                                                                                                                                                                                                                                                                                                                                 |
|---|-----------------------------------------------------------------------------------------------------------------------------------------------------------------------------------------------------------------------------------------------------------------------------------------------------------------------------------------------------------------------------------------------------------------|
| 1 | TITLE-ABS-KEY(coronavirus* OR "corona virus*" OR OC43 OR NL63 OR 22pE OR HKU1 OR HCoV* OR ncov* OR covid* OR sars-cov* OR sarscov* OR Sars-coronavirus* OR "Severe Acute Respiratory Syndrome Coronavirus*" OR coronavirnae OR "coronavirus infection")                                                                                                                                                         |
| 2 | TITLE-ABS-KEY(SARS or SARS-CoV OR MERS OR MERS-CoV OR "Middle East respiratory syndrome" OR camel* OR dromedary* OR equine OR coronary OR coronal OR coidence* OR covidien OR influenza virus OR HIV or bovine OR calves OR TGEV OR feline OR porcine OR BCoV OR PEDV OR PDCoV OR FIPV OR FCoV OR SADS-CoV OR canine or CCov OR zoonotic OR avian influenza OR H1N1 OR H5N1 OR H5N6 OR IBV OR "murine corona*") |
| 3 | #1 NOT #2                                                                                                                                                                                                                                                                                                                                                                                                       |
| 4 | TITLE-ABS-KEY((pneumonia OR covid* OR coronavirus* OR "corona virus*" OR ncov* OR 2019-ncov OR sars*) AND Wuhan)                                                                                                                                                                                                                                                                                                |



5

|    |                                                                                                                                                                                                                                                                                                                                                                                                                                                                                                                                                                                                             |
|----|-------------------------------------------------------------------------------------------------------------------------------------------------------------------------------------------------------------------------------------------------------------------------------------------------------------------------------------------------------------------------------------------------------------------------------------------------------------------------------------------------------------------------------------------------------------------------------------------------------------|
| 5  | TITLE-ABS-KEY("coronavirus disease 2019" OR 2019-ncov OR 2019nCoV OR ncov2019 OR ncov19 OR ncov-19 OR HCoV-19 OR "2019-novel CoV" OR "severe acute respiratory syndrome coronavirus 2" OR sars2 OR "sars 2" OR sars-cov2 OR sars-cov-2 OR sarscov2 OR sarscov-2 OR Sars-coronavirus2 OR Sars-coronavirus-2 OR SARS-CoV-19 OR "SARS-like coronavirus*" OR coronavirus-19 OR covid19 OR covid-19 OR "covid 2019" OR ((novel OR new OR nouveau) W/2 (CoV OR nCoV OR covid OR coronavirus* OR "corona virus" OR Pandemi*2)) OR ((covid OR covid19 OR covid-19) AND pandemic*2) OR (coronavirus* AND pneumonia)) |
| 6  | #3 OR #4 OR #5                                                                                                                                                                                                                                                                                                                                                                                                                                                                                                                                                                                              |
| 7  | TITLE-ABS-KEY((acces* OR avail*) W/2 (healthcare OR "health care" OR "health service*"))                                                                                                                                                                                                                                                                                                                                                                                                                                                                                                                    |
| 8  | TITLE-ABS-KEY("socioeconomic factors" OR "health services accessibility")                                                                                                                                                                                                                                                                                                                                                                                                                                                                                                                                   |
| 9  | TITLE-ABS-KEY ("education* achieve*" OR "education* status")                                                                                                                                                                                                                                                                                                                                                                                                                                                                                                                                                |
| 10 | TITLE-ABS-KEY("health insurance" (standard* W/1 living) OR "social determinant*" OR unemployment OR "social isolation" OR "psychosocial deprivation" OR "rural health" OR "social environment" OR "social exclusion" OR "social marginali?ation")                                                                                                                                                                                                                                                                                                                                                           |
| 11 | TITLE-ABS-KEY("social deprivation" OR "social disadvantage" OR "financial difficult*" OR "social determinant* of health" OR SDOH OR SDH OR "financial problem?" OR "income difference*" OR indigent* OR "insurance status" OR jobless OR "job insecurity*" OR "low income" OR marginali* OR "occupation* status")                                                                                                                                                                                                                                                                                           |
| 12 | TITLE-ABS-KEY(poverty OR SES OR "social disparit*" OR "social environment" OR "social exclusion" OR "social factor?" OR "social gradient?" OR "social position?" OR "social variation?" OR "socioeconomic status" OR "socioeconomic circumstances" OR "socioeconomic gradient")                                                                                                                                                                                                                                                                                                                             |
| 13 | TITLE-ABS-KEY("socioeconomic health differences" OR "socioeconomic position" OR "socioeconomic variable" OR underprivilege* OR unemployed OR unemployment OR uninsur* OR "vulnerable population" OR "vulnerable group?" OR "vulnerable communit*" OR "vulnerable people" OR "vulnerable person?")                                                                                                                                                                                                                                                                                                           |
| 14 | TITLE-ABS-KEY((socio* OR social*) W/10 (predict* OR prognos* OR risk*))                                                                                                                                                                                                                                                                                                                                                                                                                                                                                                                                     |

6

|    |                                                   |
|----|---------------------------------------------------|
| 15 | #7 OR #8 OR #9 OR #10 OR #11 OR #12 OR #13 OR #14 |
| 16 | #6 AND #15                                        |

**WHO Database**

|   |                                                                                                                                                                                                                                                                                                                                               |
|---|-----------------------------------------------------------------------------------------------------------------------------------------------------------------------------------------------------------------------------------------------------------------------------------------------------------------------------------------------|
| 1 | (acces* healthcare OR acces* heath care OR acces* health service* OR avail* healthcare OR avail* health care OR avail* health service*)                                                                                                                                                                                                       |
| 2 | ("socioeconomic factors" OR "health services accessibility")                                                                                                                                                                                                                                                                                  |
| 3 | (education* achieve* OR education* status)                                                                                                                                                                                                                                                                                                    |
| 4 | ("health insurance" OR social determinant* OR unemployment OR "social isolation" OR "psychosocial deprivation" OR "social environment" OR "social exclusion" OR social marginali?ation)                                                                                                                                                       |
| 5 | ("social deprivation" OR "social disadvantage" OR financial difficult* OR "social determinants of health" OR SDOH OR SDH OR "financial problem" OR "financial problems" OR "income difference" OR "income differences" OR indigent* OR "insurance status" OR jobless OR "job insecurity" OR "low income" OR marginali* OR occupation* status) |
| 6 | (poverty OR SES OR social disparit* OR "social environment" OR "social exclusion" OR "social factor" OR "social factors" OR "social gradient" OR "social position" OR "social positions" OR "social variation" OR "social variations" OR "socioeconomic status" OR "socioeconomic circumstances" OR "socioeconomic gradient")                 |
| 7 | ("socioeconomic health differences" OR "socioeconomic position" OR "socioeconomic variable" OR underprivilege* OR unemployed OR unemployment OR uninsur* OR "vulnerable population" OR "vulnerable group" OR "vulnerable groups" OR "vulnerable community" OR "vulnerable communities" OR "vulnerable people" OR "vulnerable person")         |
| 8 | #1 OR #2 OR #3 OR #4 OR #5 OR #6 OR #7                                                                                                                                                                                                                                                                                                        |

**PRISMA-P (Preferred Reporting Items for Systematic review and Meta-Analysis Protocols) 2015 checklist: recommended items to address in a systematic review protocol\***

| Section and topic                 | Item No | Checklist item                                                                                                                                                                                                                            |
|-----------------------------------|---------|-------------------------------------------------------------------------------------------------------------------------------------------------------------------------------------------------------------------------------------------|
| <b>ADMINISTRATIVE INFORMATION</b> |         |                                                                                                                                                                                                                                           |
| Title:                            |         |                                                                                                                                                                                                                                           |
| Identification                    | 1a      | Identify the report as a protocol of a systematic review (page 1)                                                                                                                                                                         |
| Update                            | 1b      | If the protocol is for an update of a previous systematic review, identify as such (N/A)                                                                                                                                                  |
| Registration                      | 2       | If registered, provide the name of the registry (such as PROSPERO) and registration number (page 3)                                                                                                                                       |
| Authors:                          |         |                                                                                                                                                                                                                                           |
| Contact                           | 3a      | Provide name, institutional affiliation, e-mail address of all protocol authors; provide physical mailing address of corresponding author (page 1)                                                                                        |
| Contributions                     | 3b      | Describe contributions of protocol authors and identify the guarantor of the review (page 12/13)                                                                                                                                          |
| Amendments                        | 4       | If the protocol represents an amendment of a previously completed or published protocol, identify as such and list changes; otherwise, state plan for documenting important protocol amendments (N/A)                                     |
| Support:                          |         |                                                                                                                                                                                                                                           |
| Sources                           | 5a      | Indicate sources of financial or other support for the review (page 13)                                                                                                                                                                   |
| Sponsor                           | 5b      | Provide name for the review funder and/or sponsor (page 13)                                                                                                                                                                               |
| Role of sponsor or funder         | 5c      | Describe roles of funder(s), sponsor(s), and/or institution(s), if any, in developing the protocol (N/A)                                                                                                                                  |
| <b>INTRODUCTION</b>               |         |                                                                                                                                                                                                                                           |
| Rationale                         | 6       | Describe the rationale for the review in the context of what is already known (page 4/5/6)                                                                                                                                                |
| Objectives                        | 7       | Provide an explicit statement of the question(s) the review will address with reference to participants, interventions, comparators, and outcomes (PICO) ( page 6)                                                                        |
| <b>METHODS</b>                    |         |                                                                                                                                                                                                                                           |
| Eligibility criteria              | 8       | Specify the study characteristics (such as PICO, study design, setting, time frame) and report characteristics (such as years considered, language, publication status) to be used as criteria for eligibility for the review ( page 8/9) |
| Information sources               | 9       | Describe all intended information sources (such as electronic databases, contact with study authors, trial registers or other grey literature sources) with planned dates of coverage (page 10)                                           |
| Search strategy                   | 10      | Present draft of search strategy to be used for at least one electronic database, including planned limits, such that it could be repeated (page 10, Supplement 1)                                                                        |
| Study records:                    |         |                                                                                                                                                                                                                                           |
| Data management                   | 11a     | Describe the mechanism(s) that will be used to manage records and data throughout the review (page 10/11)                                                                                                                                 |

1  
2  
3  
4  
5  
6  
7  
8  
9  
10  
11  
12  
13  
14  
15  
16  
17  
18  
19  
20  
21  
22  
23  
24  
25  
26  
27  
28  
29  
30  
31  
32  
33  
34  
35  
36  
37  
38  
39  
40  
41  
42  
43  
44  
45  
46

|                                    |     |                                                                                                                                                                                                                                                        |
|------------------------------------|-----|--------------------------------------------------------------------------------------------------------------------------------------------------------------------------------------------------------------------------------------------------------|
| Selection process                  | 11b | State the process that will be used for selecting studies (such as two independent reviewers) through each phase of the review (that is, screening, eligibility and inclusion in meta-analysis) (page 10)                                              |
| Data collection process            | 11c | Describe planned method of extracting data from reports (such as piloting forms, done independently, in duplicate), any processes for obtaining and confirming data from investigators (page 10)                                                       |
| Data items                         | 12  | List and define all variables for which data will be sought (such as PICO items, funding sources), any pre-planned data assumptions and simplifications (page 11)                                                                                      |
| Outcomes and prioritization        | 13  | List and define all outcomes for which data will be sought, including prioritization of main and additional outcomes, with rationale (page 11)                                                                                                         |
| Risk of bias in individual studies | 14  | Describe anticipated methods for assessing risk of bias of individual studies, including whether this will be done at the outcome or study level, or both; state how this information will be used in data synthesis (page 11)                         |
| Data synthesis                     | 15a | Describe criteria under which study data will be quantitatively synthesised (page 11/12)                                                                                                                                                               |
|                                    | 15b | If data are appropriate for quantitative synthesis, describe planned summary measures, methods of handling data and methods of combining data from studies, including any planned exploration of consistency (such as $I^2$ , Kendall's $\tau$ ) (N/A) |
|                                    | 15c | Describe any proposed additional analyses (such as sensitivity or subgroup analyses, meta-regression) (N/A)                                                                                                                                            |
|                                    | 15d | If quantitative synthesis is not appropriate, describe the type of summary planned (page 11/12)                                                                                                                                                        |
| Meta-bias(es)                      | 16  | Specify any planned assessment of meta-bias(es) (such as publication bias across studies, selective reporting within studies) (at page 8)                                                                                                              |
| Confidence in cumulative evidence  | 17  | Describe how the strength of the body of evidence will be assessed (such as GRADE) (page 6/7)                                                                                                                                                          |

**\* It is strongly recommended that this checklist be read in conjunction with the PRISMA-P Explanation and Elaboration (cite when available) for important clarification on the items. Amendments to a review protocol should be tracked and dated. The copyright for PRISMA-P (including checklist) is held by the PRISMA-P Group and is distributed under a Creative Commons Attribution Licence 4.0.**

*From: Shamseer L, Moher D, Clarke M, Ghersi D, Liberati A, Petticrew M, Shekelle P, Stewart L, PRISMA-P Group. Preferred reporting items for systematic review and meta-analysis protocols (PRISMA-P) 2015: elaboration and explanation. BMJ. 2015 Jan 2;349(jan02 1):g7647.*
