# Supplementary material for: Impact and variability of social determinants of health on the transmission and outcomes of COVID-19 across the world: a systematic review protocol
Source: PubMed Central journal article supplement — BMJ Open. 2021 Dec 1;11(12):e053481. doi: 10.1136/bmjopen-2021-053481 (PMC8637315; doi:10.1136/bmjopen-2021-053481), 2021-12-01
Supplement: bmjopen-2021-053481supp001.pdf [file bmjopen-2021-053481supp001.pdf]

1

**SUPPLEMENT 1:****Embase**

|    |                                                                                                                                                                                                                                                                                                               |
|----|---------------------------------------------------------------------------------------------------------------------------------------------------------------------------------------------------------------------------------------------------------------------------------------------------------------|
| 13 | 'health care access'/de                                                                                                                                                                                                                                                                                       |
| 14 | ((acces* OR avail*) NEXT/2 (healthcare OR 'health care' OR 'health service*')):ti,ab,kw                                                                                                                                                                                                                       |
| 15 | 'socioeconomics'/exp                                                                                                                                                                                                                                                                                          |
| 16 | ('socioeconomic factors' OR 'health services accessibility'):ti,ab,kw,de                                                                                                                                                                                                                                      |
| 17 | (education* achieve* OR education* status):ti,ab,kw,de                                                                                                                                                                                                                                                        |
| 18 | 'health insurance'/de                                                                                                                                                                                                                                                                                         |
| 19 | 'unemployment'/de                                                                                                                                                                                                                                                                                             |
| 20 | 'social isolation'/exp                                                                                                                                                                                                                                                                                        |
| 21 | 'social determinant of health'/de                                                                                                                                                                                                                                                                             |
| 22 | 'social environment'/de                                                                                                                                                                                                                                                                                       |
| 23 | 'social exclusion'/de                                                                                                                                                                                                                                                                                         |
| 24 | ('health insurance' (standard* NEXT/1 living) OR 'social determinant*' OR unemployment OR 'social isolation' OR 'psychosocial deprivation' OR 'social environment' OR 'social exclusion' OR 'social marginali*ation'):ti,ab,kw                                                                                |
| 25 | ('social determinant? of health' OR SDOH OR SDH OR 'social deprivation' OR 'social disadvantage' OR 'financial difficult*' OR 'financial problem?' OR 'income difference*' OR indigent* OR 'insurance status' OR jobless OR 'job insecurity*' OR 'low income' OR marginali* OR 'occupation* status'):ti,ab,kw |
| 26 | (Poverty OR SES OR 'social disparit*' OR 'social environment' OR 'social exclusion' OR 'social factor?' OR 'social gradient?' OR 'social position?' OR 'social variation?' OR 'socioeconomic status' OR 'socioeconomic circumstances' OR 'socioeconomic gradient'):ti,ab,kw                                   |
| 27 | ('socioeconomic health differences' OR 'socioeconomic position' OR 'socioeconomic variable' OR underprivilege* OR unemployed OR unemployment OR uninsur* OR 'vulnerable population' OR 'vulnerable group?' OR 'vulnerable communit*' OR 'vulnerable people' OR 'vulnerable person?'):ti,ab,kw                 |
| 28 | ((socio* OR social*) NEXT/10 (predict* OR prognos* OR risk*)):ti,ab,kw                                                                                                                                                                                                                                        |

2

|    |                                                                                                              |
|----|--------------------------------------------------------------------------------------------------------------|
| 29 | #13 OR #14 OR #15 OR #16 OR #17 OR #18 OR #19 OR #20 OR #21 OR #22 OR #23 OR #24 OR #25 OR #26 OR #27 OR #28 |
| 30 | #12 AND #29                                                                                                  |

**PubMed**

|   |                                                                                                                                                                                                                                                                                                                                                                                                                                                                                                                                                 |
|---|-------------------------------------------------------------------------------------------------------------------------------------------------------------------------------------------------------------------------------------------------------------------------------------------------------------------------------------------------------------------------------------------------------------------------------------------------------------------------------------------------------------------------------------------------|
| 1 | "Coronavirus"[Mesh]                                                                                                                                                                                                                                                                                                                                                                                                                                                                                                                             |
| 2 | "Coronavirus Infections"[Mesh]                                                                                                                                                                                                                                                                                                                                                                                                                                                                                                                  |
| 3 | (coronavirus*[tw] OR corona virus*[tw] OR OC43[tw] OR NL63[tw] OR 22pE[tw] OR HKU1[tw] OR HCoV*[tw] OR ncov*[tw] OR covid*[tw] OR sars-cov*[tw] OR sarscov*[tw] OR Sars-coronavirus*[tw] OR Severe Acute Respiratory Syndrome Coronavirus*[tw])                                                                                                                                                                                                                                                                                                 |
| 4 | #1 OR #2 OR #3                                                                                                                                                                                                                                                                                                                                                                                                                                                                                                                                  |
| 5 | (MERS[tw] OR MERS-CoV[tw] OR Middle East respiratory syndrome[tw] OR camel*[tw] OR dromedary*[tw] OR equine[tw] OR coronary[tw] OR coronal[tw] OR covidence*[tw] OR covidien[tw] OR influenza virus[tw] OR HIV[tw] OR bovine[tw] OR calves[tw] OR TGEV[tw] OR feline[tw] OR porcine[tw] OR BCoV[tw] OR PEDV[tw] OR PDCoV[tw] OR FIPV[tw] OR FCoV[tw] OR SADS-CoV[tw] OR canine[tw] OR CCov[tw] OR zoonotic[tw] OR avian influenza[tw] OR H1N1[tw] OR H5N1[tw] OR H5N6[tw] OR IBV[tw] OR murine corona*[tw])                                     |
| 6 | #4 NOT #5                                                                                                                                                                                                                                                                                                                                                                                                                                                                                                                                       |
| 7 | ((((pneumonia[tw] OR covid*[tw] OR coronavirus*[tw] OR corona virus*[tw] OR ncov*[tw] OR 2019ncov[tw] OR sars*[tw]) OR "Pneumonia"[Mesh]) AND Wuhan[tw])                                                                                                                                                                                                                                                                                                                                                                                        |
| 8 | (coronavirus disease 2019[tw] OR 2019-ncov[tw] OR 2019nCoV[tw] OR ncov2019[tw] OR ncov19[tw] OR ncov-19[tw] OR HCoV-19[tw] OR 2019-novel CoV[tw] OR severe acute respiratory syndrome coronavirus 2[tw] OR sars2[tw] OR sars 2[tw] OR sars-cov2[tw] OR sars-cov-2[tw] OR sarscov2[tw] OR sarscov-2[tw] OR Sars-coronavirus2[tw] OR Sars-coronavirus-2[tw] OR SARS-CoV-19[tw] OR SARS-like coronavirus*[tw] OR coronavirus-19[tw] OR covid19[tw] OR covid-19[tw] OR covid 2019[tw] OR ((novel[tw] OR new[tw] OR nouveau[tw]) AND (CoV OR nCoV OR |

3

|    |                                                                                                                                                                                                                                                                                                                                                                                                          |
|----|----------------------------------------------------------------------------------------------------------------------------------------------------------------------------------------------------------------------------------------------------------------------------------------------------------------------------------------------------------------------------------------------------------|
|    | covid OR coronavirus*) OR ("corona virus" OR Pandemi*) OR coronavirus pandemic[tw] OR covid pandemic [tw] OR covid19 pandemic[tw] OR covid-19 pandemic[tw])                                                                                                                                                                                                                                              |
| 9  | "COVID-19" [Supplementary Concept]                                                                                                                                                                                                                                                                                                                                                                       |
| 10 | "severe acute respiratory syndrome coronavirus 2" [Supplementary Concept]                                                                                                                                                                                                                                                                                                                                |
| 11 | #7 OR #12 OR #9 OR #10                                                                                                                                                                                                                                                                                                                                                                                   |
| 12 | #6 OR #11                                                                                                                                                                                                                                                                                                                                                                                                |
| 13 | "Health Services Accessibility"[Mesh]                                                                                                                                                                                                                                                                                                                                                                    |
| 14 | (acces* healthcare[tw] OR acces* heath care[tw] OR acces* health service*[tw] OR avail* healthcare[tw] OR avail* health care[tw] OR avail* health service*[tw])                                                                                                                                                                                                                                          |
| 15 | "socioeconomic factors"[MeSH]                                                                                                                                                                                                                                                                                                                                                                            |
| 16 | (socioeconomic factors[tw] OR socioeconomic[tw] OR health services accessibility[tw])                                                                                                                                                                                                                                                                                                                    |
| 17 | (education* achieve*[tw] OR education* status[tw])                                                                                                                                                                                                                                                                                                                                                       |
| 18 | "Insurance, Health"[MeSH:NoExp]                                                                                                                                                                                                                                                                                                                                                                          |
| 19 | "Unemployment"[MeSH]                                                                                                                                                                                                                                                                                                                                                                                     |
| 20 | "Social Isolation"[Mesh]                                                                                                                                                                                                                                                                                                                                                                                 |
| 21 | "Social Determinants of Health"[MeSH]                                                                                                                                                                                                                                                                                                                                                                    |
| 22 | "Social Environment"[Mesh:NoExp]                                                                                                                                                                                                                                                                                                                                                                         |
| 23 | "Social Marginalization"[Mesh]                                                                                                                                                                                                                                                                                                                                                                           |
| 24 | (health insurance[tw] OR "standard of living"[tw] OR social determinant*[tw] OR unemployment[tw] OR social isolation[tw] OR psychosocial deprivation[tw] OR social environment[tw] OR social exclusion[tw] OR social marginalization[tw] OR social marginalisation[tw])                                                                                                                                  |
| 25 | (social determinant of health[tw] OR social determinants of health[tw] OR SDOH[tw] OR SDH[tw] OR social deprivation[tw] OR social disadvantage[tw] OR financial difficult*[tw] OR financial problem[tw] OR financial problems[tw] OR income differences[tw] OR indigent[tw] OR insurance status[tw] OR jobless[tw] OR job insecurity*[tw] OR low income[tw] OR marginali*[tw] OR occupation* status[tw]) |

4

|    |                                                                                                                                                                                                                                                                                                                                                                                 |
|----|---------------------------------------------------------------------------------------------------------------------------------------------------------------------------------------------------------------------------------------------------------------------------------------------------------------------------------------------------------------------------------|
| 26 | (poverty[tw] OR SES[tw] OR social disparit*[tw] OR social factor[tw] OR social factors[tw] OR social gradient[tw] OR social gradients[tw] OR social position[tw] OR social positions[tw] OR social variation[tw] OR social variations[tw] OR socioeconomic status[tw] OR socioeconomic circumstance*[tw] OR socioeconomic gradient[tw])                                         |
| 27 | (socioeconomic health differences[tw] OR socioeconomic position[tw] OR socioeconomic variable[tw] OR underprivilege*[tw] OR unemployed[tw] OR uninsur*[tw] OR vulnerable population[tw] OR vulnerable populations[tw] OR vulnerable group[tw] OR vulnerable groups[tw] OR vulnerable communit*[tw] OR vulnerable people[tw] OR vulnerable person[tw] OR vulnerable persons[tw]) |
| 28 | (socio* predict*[tw] OR socio* prognos*[tw] OR socio* risk*[tw] OR social*predict*[tw] OR social* prognos*[tw] OR social* risk*[tw])                                                                                                                                                                                                                                            |
| 29 | #13 OR #14 OR #15 OR #16 OR #17 OR #18 OR #19 OR #20 OR #21 OR #22 OR #23 OR #24 OR #25 OR #26 OR #27 OR #28                                                                                                                                                                                                                                                                    |
| 30 | #12 AND #29                                                                                                                                                                                                                                                                                                                                                                     |

### Scopus

|   |                                                                                                                                                                                                                                                                                                                                                                                                                 |
|---|-----------------------------------------------------------------------------------------------------------------------------------------------------------------------------------------------------------------------------------------------------------------------------------------------------------------------------------------------------------------------------------------------------------------|
| 1 | TITLE-ABS-KEY(coronavirus* OR "corona virus*" OR OC43 OR NL63 OR 22pE OR HKU1 OR HCoV* OR ncov* OR covid* OR sars-cov* OR sarscov* OR Sars-coronavirus* OR "Severe Acute Respiratory Syndrome Coronavirus*" OR coronavirnae OR "coronavirus infection")                                                                                                                                                         |
| 2 | TITLE-ABS-KEY(SARS or SARS-CoV OR MERS OR MERS-CoV OR "Middle East respiratory syndrome" OR camel* OR dromedary* OR equine OR coronary OR coronal OR coidence* OR covidien OR influenza virus OR HIV or bovine OR calves OR TGEV OR feline OR porcine OR BCoV OR PEDV OR PDCoV OR FIPV OR FCoV OR SADS-CoV OR canine or CCov OR zoonotic OR avian influenza OR H1N1 OR H5N1 OR H5N6 OR IBV OR "murine corona*") |
| 3 | #1 NOT #2                                                                                                                                                                                                                                                                                                                                                                                                       |
| 4 | TITLE-ABS-KEY((pneumonia OR covid* OR coronavirus* OR "corona virus*" OR ncov* OR 2019-ncov OR sars*) AND Wuhan)                                                                                                                                                                                                                                                                                                |

5

|    |                                                                                                                                                                                                                                                                                                                                                                                                                                                                                                                                                                                                             |
|----|-------------------------------------------------------------------------------------------------------------------------------------------------------------------------------------------------------------------------------------------------------------------------------------------------------------------------------------------------------------------------------------------------------------------------------------------------------------------------------------------------------------------------------------------------------------------------------------------------------------|
| 5  | TITLE-ABS-KEY("coronavirus disease 2019" OR 2019-ncov OR 2019nCoV OR ncov2019 OR ncov19 OR ncov-19 OR HCoV-19 OR "2019-novel CoV" OR "severe acute respiratory syndrome coronavirus 2" OR sars2 OR "sars 2" OR sars-cov2 OR sars-cov-2 OR sarscov2 OR sarscov-2 OR Sars-coronavirus2 OR Sars-coronavirus-2 OR SARS-CoV-19 OR "SARS-like coronavirus*" OR coronavirus-19 OR covid19 OR covid-19 OR "covid 2019" OR ((novel OR new OR nouveau) W/2 (CoV OR nCoV OR covid OR coronavirus* OR "corona virus" OR Pandemi*2)) OR ((covid OR covid19 OR covid-19) AND pandemic*2) OR (coronavirus* AND pneumonia)) |
| 6  | #3 OR #4 OR #5                                                                                                                                                                                                                                                                                                                                                                                                                                                                                                                                                                                              |
| 7  | TITLE-ABS-KEY((acces* OR avail*) W/2 (healthcare OR "health care" OR "health service*"))                                                                                                                                                                                                                                                                                                                                                                                                                                                                                                                    |
| 8  | TITLE-ABS-KEY("socioeconomic factors" OR "health services accessibility")                                                                                                                                                                                                                                                                                                                                                                                                                                                                                                                                   |
| 9  | TITLE-ABS-KEY ("education* achieve*" OR "education* status")                                                                                                                                                                                                                                                                                                                                                                                                                                                                                                                                                |
| 10 | TITLE-ABS-KEY("health insurance" (standard* W/1 living) OR "social determinant*" OR unemployment OR "social isolation" OR "psychosocial deprivation" OR "rural health" OR "social environment" OR "social exclusion" OR "social marginali?ation")                                                                                                                                                                                                                                                                                                                                                           |
| 11 | TITLE-ABS-KEY("social deprivation" OR "social disadvantage" OR "financial difficult*" OR "social determinant* of health" OR SDOH OR SDH OR "financial problem?" OR "income difference*" OR indigent* OR "insurance status" OR jobless OR "job insecurity*" OR "low income" OR marginali* OR "occupation* status")                                                                                                                                                                                                                                                                                           |
| 12 | TITLE-ABS-KEY(poverty OR SES OR "social disparit*" OR "social environment" OR "social exclusion" OR "social factor?" OR "social gradient?" OR "social position?" OR "social variation?" OR "socioeconomic status" OR "socioeconomic circumstances" OR "socioeconomic gradient")                                                                                                                                                                                                                                                                                                                             |
| 13 | TITLE-ABS-KEY("socioeconomic health differences" OR "socioeconomic position" OR "socioeconomic variable" OR underprivilege* OR unemployed OR unemployment OR uninsur* OR "vulnerable population" OR "vulnerable group?" OR "vulnerable communit*" OR "vulnerable people" OR "vulnerable person?")                                                                                                                                                                                                                                                                                                           |
| 14 | TITLE-ABS-KEY((socio* OR social*) W/10 (predict* OR prognos* OR risk*))                                                                                                                                                                                                                                                                                                                                                                                                                                                                                                                                     |

6

|    |                                                   |
|----|---------------------------------------------------|
| 15 | #7 OR #8 OR #9 OR #10 OR #11 OR #12 OR #13 OR #14 |
| 16 | #6 AND #15                                        |

**WHO Database**

|   |                                                                                                                                                                                                                                                                                                                                               |
|---|-----------------------------------------------------------------------------------------------------------------------------------------------------------------------------------------------------------------------------------------------------------------------------------------------------------------------------------------------|
| 1 | (acces* healthcare OR acces* heath care OR acces* health service* OR avail* healthcare OR avail* health care OR avail* health service*)                                                                                                                                                                                                       |
| 2 | ("socioeconomic factors" OR "health services accessibility")                                                                                                                                                                                                                                                                                  |
| 3 | (education* achieve* OR education* status)                                                                                                                                                                                                                                                                                                    |
| 4 | ("health insurance" OR social determinat* OR unemployment OR "social isolation" OR "psychosocial deprivation" OR "social environment" OR "social exclusion" OR social marginali?ation)                                                                                                                                                        |
| 5 | ("social deprivation" OR "social disadvantage" OR financial difficult* OR "social determinants of health" OR SDOH OR SDH OR "financial problem" OR "financial problems" OR "income difference" OR "income differences" OR indigent* OR "insurance status" OR jobless OR "job insecurity" OR "low income" OR marginali* OR occupation* status) |
| 6 | (poverty OR SES OR social disparit* OR "social environment" OR "social exclusion" OR "social factor" OR "social factors" OR "social gradient" OR "social position" OR "social positions" OR "social variation" OR "social variations" OR "socioeconomic status" OR "socioeconomic circumstances" OR "socioeconomic gradient")                 |
| 7 | ("socioeconomic health differences" OR "socioeconomic position" OR "socioeconomic variable" OR underprivilege* OR unemployed OR unemployment OR uninsur* OR "vulnerable population" OR "vulnerable group" OR "vulnerable groups" OR "vulnerable community" OR "vulnerable communities" OR "vulnerable people" OR "vulnerable person")         |
| 8 | #1 OR #2 OR #3 OR #4 OR #5 OR #6 OR #7                                                                                                                                                                                                                                                                                                        |
